# Supplementary material for: Global infectious disease risks associated with occupational exposure among non-healthcare workers: a systematic review of the literature
Source: HighWire-hosted journal article supplement (doi:10.1136/oemed-2020-107164), 2021-05-25
Supplement: oemed-2020-107164supp001_data_supplement.pdf [file oemed-2020-107164supp001_data_supplement.pdf]

Table A1. Total number of references of published articles from January 1, 2009 to December 8, 2020

infectious diseases occupational exposure

|                  | References   | References after deduplication |
|------------------|--------------|--------------------------------|
| embase.com       | 8251         | 8138                           |
| Medline Ovid     | 7060         | 1862                           |
| Cochrane CENTRAL | 94           | 25                             |
| <b>Total</b>     | <b>15405</b> | <b>10025</b>                   |

**embase.com**

(infection/mj/exp OR 'environmental microbiology'/mj/de OR 'virus'/mj/exp OR 'virus transmission'/mj/exp OR 'bacterium'/mj/exp OR 'parasite'/mj/exp OR 'helminth'/mj/exp OR 'fungus'/mj/exp OR 'microorganism'/mj/exp OR 'infectious agent'/mj/exp OR 'infection risk'/mj/exp OR 'infection control'/mj/exp OR 'bloodborne bacterium'/mj/exp OR 'coronavirus disease 2019'/de OR 'Severe acute respiratory syndrome coronavirus 2'/exp OR (((communicable) NEAR/3 disease\*) OR infect\* OR zoonos\* OR zoonot\* OR parasit\* OR mycos\* OR virus OR viral OR bacter\* OR ((environment\* OR air) NEAR/3 microbiol\*) OR parasite\* OR helminth\* OR fungus OR fungi OR fungal OR microorganism\* OR micro-organism\* OR pathogen OR pathogens OR mould OR bioaerosol\* OR bio-aerosol\* OR seroconversion\* OR hiv OR mrsa OR malaria OR cmv OR tubercul\* OR q-fever OR staphylococ\* OR enterococ\* OR Leptospir\* OR Cytomegalovir\* OR seropositive\* OR Brucell\* OR hepatit\* OR tetanus OR lyme OR Borrelia\* OR influenza OR dengue OR legion\* OR hcv OR hpv OR papilloma\* OR meningit\* OR aids OR covid OR coronavirus-disease-2019 OR sars-cov-2 OR Severe-acute-respiratory-syndrome-coronavirus-2):ti) AND ('work'/mj/de OR 'work environment'/mj/de OR 'workroom air'/mj/de OR workplace/mj/de OR 'employee'/mj/exp OR personnel/mj/de OR worker/mj/de OR 'laboratory personnel'/mj/de OR 'nonmedical occupations'/mj/exp OR 'occupational disease'/mj/exp OR 'occupational health'/mj/exp OR 'occupational medicine'/mj/exp OR 'occupational exposure'/mj/exp OR 'industrial hygiene'/mj/exp OR (at-work OR ((worker OR workers) NOT (care-worker\* OR hospital-worker\* OR medical-worker\* OR health-worker\* OR healthcare-worker\*)) OR laborer\* OR labourer\* OR occupation\* OR (employee\* NOT (care-employee\* OR hospital-employee\* OR medical-employee\* OR health-employee\* OR healthcare-employee\*)) OR workplace OR (personnel\* NOT (care-personnel\* OR health-personnel\* OR hospital-personnel\* OR medical-personnel\* OR healthcare-personnel\*)) OR butcher\* OR hunter\* OR veterinarian\* OR farmer\* OR slaughterhouse OR slaughter-house OR abattoir\* OR barber\* OR (Waste NEAR/3 Picker\*) OR veteran OR veterans OR (police NEAR/3 officer\*) OR soldier\* OR teacher\* OR (truck NEAR/3 driver\*) OR ((working OR work) NEAR/3 (environment\* OR associate\* OR farm\* OR industr\*)) OR fishermen\* OR military OR ((food OR meat) NEAR/3 hand\*) OR (cattle NEAR/3 keeper\*) OR miners OR farmworker\*):ti) AND ('risk factor'/mj/exp OR 'risk'/mj/exp OR 'risk assessment'/mj/exp OR 'statistics'/mj/exp OR 'epidemiological data'/mj/exp OR 'epidemiology'/mj/exp OR exposure/mj/de OR 'occupational exposure'/mj/de OR 'environmental exposure'/mj/de OR 'statistics and numerical data'/mj/de OR (risk OR risks OR statistic\*

OR numerical\* OR epidem\* OR seroepidem\* OR incidence\* OR prevalen\* OR seroprevalen\* OR expos\* OR burden\* OR emerging OR mobidit\* OR mortalit\* OR surviv\* OR outbreak\*):ti) NOT ([Conference Abstract]/lim) AND [English]/lim

### Medline Ovid

(\*Infection/ OR \*Environmental Microbiology/ OR exp \*Viruses/ OR exp \*Virus Diseases/ OR exp \*Bacteria/ OR exp \*Parasites/ OR exp \*Helminths/ OR exp \*Fungi/ OR \*Infection Control/ OR COVID-19/ OR SARS-CoV-2/ OR COVID-19.nm. OR severe-acute-respiratory-syndrome-coronavirus-2.nm. OR (((communicable) ADJ3 disease\*) OR infect\* OR zoonos\* OR zoonot\* OR parasit\* OR mycos\* OR virus OR viral OR bacter\* OR ((environment\* OR air) ADJ3 microbiol\*) OR parasite\* OR helminth\* OR fungus OR fungi OR fungal OR microorganism\* OR micro-organism\* OR pathogen OR pathogens OR mould OR bioaerosol\* OR bio-aerosol\* OR seroconversion\* OR hiv OR mrsa OR malaria OR cmv OR tubercul\* OR q-fever OR staphylococ\* OR enterococ\* OR Leptospir\* OR Cytomegalovir\* OR seropositive\* OR Brucell\* OR hepatit\* OR tetanus OR lyme OR Borrelia\* OR influenza OR dengue OR legion\* OR hcv OR hpv OR papilloma\* OR meningit\* OR aids OR covid OR coronavirus-disease-2019 OR sars-cov-2 OR Severe-acute-respiratory-syndrome-coronavirus-2).ti.) AND (\*Occupational Groups/ OR \*Work/ OR \*Workplace/ OR \*Laboratory Personnel/ OR \*Occupational Health Services/ OR \*Occupational Diseases/ OR \*Occupational Health/ OR \*Occupational Medicine/ OR \*Occupational Exposure/ OR (at-work OR ((worker OR workers) NOT (care-worker\* OR hospital-worker\* OR medical-worker\* OR health-worker\* OR healthcare-worker\*)) OR laborer\* OR labourer\* OR occupation\* OR (employee\* NOT (care-employee\* OR hospital-employee\* OR medical-employee\* OR health-employee\* OR healthcare-employee\*)) OR workplace OR (personnel\* NOT (care-personnel\* OR health-personnel\* OR hospital-personnel\* OR medical-personnel\* OR healthcare-personnel\*)) OR butcher\* OR hunter\* OR veterinarian\* OR farmer\* OR slaughterhouse OR slaughter-house OR abattoir\* OR barber\* OR (Waste ADJ3 Picker\*) OR veteran OR veterans OR (police ADJ3 officer\*) OR soldier\* OR teacher\* OR (truck ADJ3 driver\*) OR ((working OR work) ADJ3 (environment\* OR associate\* OR farm\* OR industr\*)) OR fishermen\* OR military OR ((food OR meat) ADJ3 handl\*) OR (cattle ADJ3 keeper\*) OR miners OR farmworker\*).ti.) AND (\*Risk Factors/ OR \*Risk/ OR \*Risk Assessment/ OR \*Epidemiology/ OR \*Occupational Exposure/ OR \*Environmental Exposure/ OR (risk OR risks OR statistic\* OR numerical\* OR epidem\* OR seroepidem\* OR incidence\* OR prevalen\* OR seroprevalen\* OR expos\* OR burden\* OR emerging OR mobidit\* OR mortalit\* OR surviv\* OR outbreak\*).ti.) AND english.la.

### Cochrane CENTRAL

coronavirus NEXT 2):ti) AND ((at next work OR ((worker OR workers) NOT (care next worker\* OR hospital next worker\* OR medical next worker\* OR health next worker\* OR healthcare next worker\*)) OR laborer\* OR labourer\* OR occupation\* OR (employee\* NOT (care next employee\* OR hospital next employee\* OR medical next employee\* OR health next employee\* OR healthcare next employee\*)) OR workplace OR (personnel\* NOT (care next personnel\* OR health next personnel\* OR hospital next personnel\* OR medical next personnel\* OR healthcare next personnel\*)) OR butcher\* OR hunter\* OR veterinarian\* OR farmer\* OR slaughterhouse OR slaughter next house OR abattoir\* OR barber\* OR (Waste NEAR/3 Picker\*) OR veteran OR veterans OR (police NEAR/3 officer\*) OR soldier\* OR teacher\* OR (truck NEAR/3 driver\*) OR ((working OR work) NEAR/3 (environment\* OR associate\* OR farm\* OR industr\*)) OR fishermen\* OR military OR ((food OR meat) NEAR/3 handl\*) OR (cattle NEAR/3 keeper\*) OR miners OR farmworker\*):ti) AND ((risk OR risks OR statistic\* OR numerical\* OR epidem\* OR seroepidem\* OR incidence\* OR prevalen\* OR seroprevalen\* OR expos\* OR burden\* OR emerging OR mobidit\* OR mortalit\* OR surviv\* OR outbreak\*):ti)
