# Supplementary material for: Global infectious disease risks associated with occupational exposure among non-healthcare workers: a systematic review of the literature
Source: HighWire-hosted journal article supplement (doi:10.1136/oemed-2020-107164), 2021-05-25
Supplement: oemed-2020-107164supp002_data_supplement.pdf [file oemed-2020-107164supp002_data_supplement.pdf]

Table A2. Summary of described job titles or occupational groups, pathogens and statistically significant risk factors separately for each article included in the review

| Author                | Job title or Occupational group       | Pathogen                   | Significant risk factors                                                                                                                                                                                                          |
|-----------------------|---------------------------------------|----------------------------|-----------------------------------------------------------------------------------------------------------------------------------------------------------------------------------------------------------------------------------|
| 2010[1]               | Military forces (Navy)                | Influenza A virus (H1N1)*  | NA                                                                                                                                                                                                                                |
| Abseno[2]             | City bus drivers and cash collectors  | Mycobacterium tuberculosis | None identified.                                                                                                                                                                                                                  |
| Adjemian[3]           | Miners                                | Marburg virus*             | NA                                                                                                                                                                                                                                |
| Alavi [4]             | Rice farmers                          | Leptospira spp.            | None identified.                                                                                                                                                                                                                  |
| Allard[5]             | Building workers                      | Histoplasma capsulatum*    | NA                                                                                                                                                                                                                                |
| Alonso[6]             | Waste-sorting workers                 | Coxiella burnetii*         | No respiratory protection mask (OR=2.8, 95%CI 1.2-6.6)                                                                                                                                                                            |
| Alonso[7]             | Pet transport couriers                | Coxiella burnetii*         | NA                                                                                                                                                                                                                                |
| Al-Sayyad[8]          | Police and Military recruits          | Mumps virus*               | NA                                                                                                                                                                                                                                |
| Al-Thaqafy[9]         | Military forces (National Guard)      | Hepatitis B virus          | Older age (aOR=5.35, 95%CI 1.15-25.01 for those aged $\geq 35$ years compared with those aged <25 years); presence of a household member with HBV (aOR=2.35, 95%CI 1.06-5.19); and previous endoscopy (aOR=2.55, 95%CI 1.06-6.11) |
| Alvarado[10]          | Military forces (Navy)                | SARS-CoV-2 virus*          | NA                                                                                                                                                                                                                                |
| Alvarado-Esquivel[11] | Waste pickers                         | Leptospira spp.(=)         | None identified.                                                                                                                                                                                                                  |
| Alvarado-Esquivel[12] | Meat workers (abattoir, butcher)      | Leptospira spp.            | Rural residence (aOR=4.29, 95%CI 1.29-14.20), duration in the activity (aOR=3.87, 95%CI 1.13 - 13.22), snake meat consumption (aOR=7.20, 95%CI 1.48-34.91), consumption of unwashed raw fruits (aOR=6.68, 95%CI 1.16-38.55)       |
| Alvarado-Esquivel[13] | Meat workers                          | Toxoplasma gondii(=)       | None identified.                                                                                                                                                                                                                  |
| Alvarado-Esquivel[14] | Livestock raiser, animal hair dresser | Toxoplasma gondii(=)       | Eating while working (OR =7.14, 95%CI 1.91-26.72), consumption of duck meat (OR=5.43, 95%CI 1.43-20.54)                                                                                                                           |
| Ambrose[15]           | Military forces                       | Legionella spp.*           | Occupants of the building                                                                                                                                                                                                         |

|                      |                                                 |                                          |                                                                                                                                                                                                                                                           |
|----------------------|-------------------------------------------------|------------------------------------------|-----------------------------------------------------------------------------------------------------------------------------------------------------------------------------------------------------------------------------------------------------------|
|                      |                                                 |                                          | closest to the cooling tower (aOR=6.9, 95%CI 2.2-22)                                                                                                                                                                                                      |
| Amsalu[16]           | Medical waste handlers                          | Hepatitis B virus, hepatitis C virus (=) | Age older than 40 years (OR=2.77, 95%CI 1.08-7.12), working in a hospital laundry (OR=9.41, 95%CI 1.06-83.84)                                                                                                                                             |
| Andriopoulos[17]     | Livestock farmers                               | Brucella spp.(=)                         | None identified.                                                                                                                                                                                                                                          |
| Ansari-Moghaddam[18] | Municipal waste workers                         | Hepatitis B virus                        | Exposure to waste (aOR=9.36, 95%CI 2.01-43.7); lack of vaccination against HBV (aOR=3.83, 95%CI 1.86-25.2); jaundice (aOR=6.91, 95%CI 1.51-31.5); history of endoscopy (aOR=2.86, 95%CI 1.08-7.62); and high risk behaviors (aOR=4.80, 95%CI 1.96 - 27.2) |
| Aquino[19]           | Military forces (Navy)                          | Influenza A virus (H3N2)*                | NA                                                                                                                                                                                                                                                        |
| Archer[20]           | Farmers                                         | Rift Valley Fever virus*                 | NA                                                                                                                                                                                                                                                        |
| Armstrong[21]        | Tunnel workers                                  | Histoplasma capsulatum*                  | NA                                                                                                                                                                                                                                                        |
| Awah-Ndukum[22]      | Abattoir workers                                | Brucella spp.                            | Handling of foetus and uterine contents (OR=13.00, 95%CI 1.51-111.88)                                                                                                                                                                                     |
| Awosanya[23]         | Kennel workers                                  | Leptospira spp.                          | Contact with sewage (OR=15.0, 95%CI 1.5-759); presence of wounds or cuts on either hands or legs (OR=12.0, 95%CI 1.7-147.5)                                                                                                                               |
| Bailey[24]           | Armed forces                                    | Leishmania spp.*                         | Proximity of accommodation to the cleared scrub (OR=6.6, 95%CI 2.3-19.1 for front row versus other two rows)                                                                                                                                              |
| Bansal[25]           | Abattoir workers, sewage workers, swine workers | Hepatitis E virus                        | Sewage work (OR=31.25, 95%CI 7.78-125.52), abattoir work (OR=25.00, 95%CI 6.81-64.74), unorganized swine farming (OR=26.85, 95%CI                                                                                                                         |

|                 |                         |                                          |                                                                                                                                                                                                                                                                                      |
|-----------------|-------------------------|------------------------------------------|--------------------------------------------------------------------------------------------------------------------------------------------------------------------------------------------------------------------------------------------------------------------------------------|
|                 |                         |                                          | 8.68-83.10)                                                                                                                                                                                                                                                                          |
| Banta[26]       | Military trainees       | Coxsackievirus A6*                       | NA                                                                                                                                                                                                                                                                                   |
| Baral[27]       | Female sex workers      | HIV                                      | None identified.                                                                                                                                                                                                                                                                     |
| Barnhart[28]    | Female bar workers      | HIV(=)                                   | NA                                                                                                                                                                                                                                                                                   |
| Beaudoin[29]    | Swine workers           | Swine influenza A virus (H2N3)(=)        | NA                                                                                                                                                                                                                                                                                   |
| Beheshti[30]    | Abattoir workers        | Brucella spp.                            | None identified.                                                                                                                                                                                                                                                                     |
| Bellali[31]     | Farmers                 | Leishmania spp.                          | Missed the irrigation tour (aOR=2.34, 95%CI 1.10-4.95); avoid administrative procedures (aOR=2.74, 95% CI 1.30-5.79)                                                                                                                                                                 |
| Bernier[32]     | Female sex workers      | HIV                                      | Outdoor sex work (aOR=3.29, 95%CI 1.72-6.27); primary residence (other Russian region than Moscow) (aOR=2.61, 95%CI 1.05-6.48)                                                                                                                                                       |
| Beste[33]       | Military Forces         | Hepatitis B virus                        | Service in a combat zone (aOR=1.56, 95%CI 1.01-2.41); being wounded in combat (aOR=1.79, 95%CI 1.04-3.08)                                                                                                                                                                            |
| Bilman[34]      | Factory workers         | Salmonella enteritidis*                  | NA                                                                                                                                                                                                                                                                                   |
| Birku[35]       | Military forces         | Hepatitis B virus, Hepatitis C virus (=) | Age $\geq$ 40 years (OR=7.6, 95%CI 2.0-29.0); history of nose piercing (OR=5.9, 95%CI 1.2-29.9); sexually transmitted infection (OR=4.3, 95%CI 1.1-16.4)                                                                                                                             |
| Boost[36]       | Abattoir workers (pigs) | MRSA                                     | None identified.                                                                                                                                                                                                                                                                     |
| Borkenhagen[37] | Swine workers           | Swine influenza virus (H1N1 and H3N2)    | <u>Swine H1N1</u> : working at swine confined animal feeding operations (aOR=19.16, 95%CI 3.55-358.65). <u>Swine H3N2</u> : working at swine confined animal feeding operations (aOR=2.97, 95 CI 1.16-8.01), outbreak among animals in the last 30 days (aOR=8.62, 95%CI 1.87-61.79) |
| Boscarino[38]   | Military Forces         | Hepatitis C virus                        | Other exposures (e.g.                                                                                                                                                                                                                                                                |

|                    |                        |                                                                                          |                                                                                                                                                                                                                                                                                                             |
|--------------------|------------------------|------------------------------------------------------------------------------------------|-------------------------------------------------------------------------------------------------------------------------------------------------------------------------------------------------------------------------------------------------------------------------------------------------------------|
|                    |                        |                                                                                          | vaccinations or shots in the military in the 1960s) (OR=2.63, 95%CI 2.00-3.46)                                                                                                                                                                                                                              |
| Boyce[39]          | Female sex workers     | HIV                                                                                      | Entered the sex trade under age 16 years (aOR=4.6, 95%CI 1.6-13.2); had not received HIV education in their first year of sex trade (aOR=2.8, 95%CI 1.5-5.5), had experienced violence to force commercial sex (aOR=4.6, 95%CI 2.2-9.8); had not used condoms in their first month (aOR=2.8, 95%CI 1.3-6.1) |
| Brinker[40]        | Military forces        | Leptospira spp.*                                                                         | NA                                                                                                                                                                                                                                                                                                          |
| Brooks[41]         | Animal handlers (mice) | Mouse retroviruses (XMRV (=), MLV (=))                                                   | NA                                                                                                                                                                                                                                                                                                          |
| Brosh-Nissimov[42] | Military forces        | Microsporum canis*                                                                       | Female gender (aOR=3.92, 95%CI 1.68-9.17), animal contact at Base (aOR=2.9, 95%CI 1.09-7.73), performed guarding duty (aOR=6.37, 95%CI 2.2-18.44)                                                                                                                                                           |
| Cárcamo[43]        | Female sex workers     | Neisseria gonorrhoeae, HIV, Syphilis, Trichomonas vaginalis, Chlamydia trachomatis, HSV2 | None identified.                                                                                                                                                                                                                                                                                            |
| Carpentier[44]     | Forestry workers       | Hepatitis E virus                                                                        | Age ≥50 years (aOR=4.54, 95%CI 2.64-7.84); woodcutting (aOR=2.24, 95%CI 1.33-3.77)                                                                                                                                                                                                                          |
| Caruso[45]         | Swine farmers          | Hepatitis E virus                                                                        | None identified.                                                                                                                                                                                                                                                                                            |
| Cassir[46]         | Shipyard workers       | Streptococcus pneumoniae*                                                                | NA                                                                                                                                                                                                                                                                                                          |
| Cavaretto[47]      | Manicurists            | Hepatitis B virus (=), hepatitis C virus (=), HIV (=)                                    | NA                                                                                                                                                                                                                                                                                                          |
| Chabata[48]        | Female sex workers     | HIV                                                                                      | None identified.                                                                                                                                                                                                                                                                                            |
| Chapman[49]        | Military forces        | Norovirus*                                                                               | Drinking/brushing teeth with water from source other than water trailer (OR=2.7, 95%CI 1.66-4.27); cleaning bathrooms (OR=4.6, 95%CI 1.69-12.55)                                                                                                                                                            |
| Chaudhry[50]       | Butchers               | Avian influenza (H9)                                                                     | Another stall                                                                                                                                                                                                                                                                                               |

|               |                                    |                              |                                                                                                                                                                                                                                                |
|---------------|------------------------------------|------------------------------|------------------------------------------------------------------------------------------------------------------------------------------------------------------------------------------------------------------------------------------------|
|               |                                    |                              | nearby (aOR=3.38, 95%CI 1.78-6.39); number of cages (more than 5) (aOR=4.9, 95%CI 1.60-14.97)                                                                                                                                                  |
| Chaussade[51] | Forestry workers, pig farm workers | Hepatitis E virus            | Consumption of pork-liver sausages (aOR=4.48, 95%CI 2.63-7.64). <u>Forestry workers</u> : occupational contact with animals (OR=1.58, 95%CI 1.03-2.43). <u>Pig farm workers</u> : occupational contact with animals (OR=2.51, 95%CI 1.70-3.70) |
| Chen[52]      | Factory workers                    | Streptococcus pyogenes*      | Age (18–20 year) (p<0.05), roommate or teammate with Streptococcus pyogenes colonization (p<0,05)                                                                                                                                              |
| Cheng[53]     | Military trainees                  | Adenovirus type 7*           | NA                                                                                                                                                                                                                                             |
| Choi[54]      | Live animal market employees       | Swine influenza (H3N2v)      | None identified.                                                                                                                                                                                                                               |
| Coman[55]     | Agriculture workers                | Avian influenza virus (H9N2) | Moderate poultry exposure (301-900 poultry-years) (aOR=3.6, 95%CI, 1.1-12.1)                                                                                                                                                                   |
| Cook[56]      | Abattoir workers                   | Leptospira spp.              | Having wounds (aOR=3.1, 95%CI 1.5-6.1), smoking (aOR=1.8, 95%CI 1.1-2.9); eating at work (aOR=2.1, 95%CI 1.2-3.6), cleaning the offal (aOR=5.1, 95%CI 1.8 to 15.0), and having a borehole for personal water use (aOR=2.3, 95%CI 1.1-4.7)      |
| Cook[57]      | Abattoir workers                   | Rift Valley Fever virus      | Being the slaughterman (aOR=3.5, 95%CI 1.0-12.1)                                                                                                                                                                                               |
| Cosby[58]     | Military forces                    | Influenza virus (H3N2)*      | NA                                                                                                                                                                                                                                             |
| Cowan[59]     | Police recruits                    | Varicella zoster virus*      | NA                                                                                                                                                                                                                                             |
| Crowell[60]   | Men who sell sex to men            | HIV                          | Age > 30 years (aRisk Ratio= 1.40, 95%CI 1.14-1.72), female gender identity (aRisk Ratio = 1.40, 95%CI 1.23-1.59), unknown education level                                                                                                     |

|                     |                            |                                                   |                                                                                                                                                                                     |
|---------------------|----------------------------|---------------------------------------------------|-------------------------------------------------------------------------------------------------------------------------------------------------------------------------------------|
|                     |                            |                                                   | (aRisk Ratio = 1.95, 95%CI 1.31-2.91)                                                                                                                                               |
| Crucitti[61]        | Female sex workers         | Trichomonas vaginalis                             | None identified.                                                                                                                                                                    |
| Cui[62]             | Seafood processing workers | Hepatitis E virus                                 | Raw seafood processing (aOR=3.82, 95%CI 2.54-5.8), ≥7 working years (aOR=3.69, 95%CI 2.16-6.31)                                                                                     |
| Cummings[63]        | Construction workers       | Coccidioides immitis*                             | NA                                                                                                                                                                                  |
| Das[64]             | Construction workers       | Coccidioides immitis*                             | NA                                                                                                                                                                                  |
| De Keukeleire[65]   | Farmers                    | Borrelia burgdorferi                              | None identified.                                                                                                                                                                    |
| De Keukeleire[66]   | Forestry workers           | Borrelia burgdorferi                              | Use of protection measures (aOR=1.57, 95%CI 1.15-2.15), intensity of tick bites (number, frequency) (aOR=3.66, 95%CI 2.40-5.57)                                                     |
| De Lange[67]        | Sheep farmers              | Coxiella burnetii                                 | Cattle contact at own or other farm (aOR=3.87, 95%CI 2.13-7.04), full working week (aOR=2.42, 95%CI 1.13-5.15), worked in cattle sector in the past (aOR=1.79, 95%CI 1.01-3.18)     |
| De Laval[68]        | Military Forces            | Norovirus*                                        | Consumption of raw mussels (RR=11.2, 95% CI 1.7-74.8)                                                                                                                               |
| De Marco[69]        | Swine workers              | Swine influenza virus (H1N1)                      | None identified.                                                                                                                                                                    |
| De Souza[70]        | Female sex workers         | Treponema pallidum                                | Low level of education attending up to the primary school (aPR=3.8, 95%CI 1.4-9.2); high frequency of anal sex during the past year (aPR =9.3, 95%CI 3.5-28.7)                      |
| Delgado Naranjo[71] | Machine tool workers       | Coxiella burnetii*                                | NA                                                                                                                                                                                  |
| Di Renzi[72]        | Forestry workers           | Borrelia burgdorferi                              | None identified.                                                                                                                                                                    |
| Diabate[73]         | Female sex workers         | Neisseria gonorrhoeae, Chlamydia trachomatis, HIV | HIV-positive FSWs (treated: aHR=4.2, 95%CI 1.60-10.77); untreated: aHR=4.2, 95%CI 1.59-11.49) were more likely to acquire NG/CT compared to HIV-negative FSWs. Place of work (bars, |

|                     |                                      |                                                                                                    |                                                                                                                                                                                                                                                                          |
|---------------------|--------------------------------------|----------------------------------------------------------------------------------------------------|--------------------------------------------------------------------------------------------------------------------------------------------------------------------------------------------------------------------------------------------------------------------------|
|                     |                                      |                                                                                                    | hotels, other) (aHR=2.4, 95%CI 1.19-4.68) compared to brothels. No consistent condom use (aHR=2.0, 95%CI 1.11-3.72)                                                                                                                                                      |
| Dongliu[74]         | Military forces                      | Adenovirus type B*                                                                                 | NA                                                                                                                                                                                                                                                                       |
| Dreyfus[75]         | Abattoir workers (sheep)             | Leptospira hardjobovis, Leptospira borgpetersenii                                                  | Working in the offal room (aOR=6.5, 95% CI 1.4-29.8), working at the middle and end of the slaughter floor (aOR=8.2, 95%CI 2.1-32.7), working at the beginning of the slaughter floor (aOR=10.4, 95%CI 2.8-38.8)                                                         |
| Dreyfus[76]         | Abattoir workers (sheep)             | Leptospira interrogans, Leptospira borgpetersenii                                                  | None identified.                                                                                                                                                                                                                                                         |
| Duggan[77]          | Pet fancy rats workers               | Hantavirus (=)                                                                                     | NA                                                                                                                                                                                                                                                                       |
| Eassa[78]           | Municipality Solid-Waste Workers     | Cryptosporidium (=), Entameuba histolytica (=), Giardia intestinalis (=), Blastocystis hominis (=) | Direct exposure to solid fecal waste (OR=1.8, 95%CI 1.1-3.0), occupational activities that allowed for direct exposure to solid fecal waste (OR=2.3, 95%CI 1.4-4.0), rural residence (aOR=1.9, 95%CI 1.1-3.2)                                                            |
| Esmaeili[79]        | Butchers and slaughterhouses workers | Brucella spp., Coxiella burnetii                                                                   | <u>Brucella</u> .: having a work history of more than 15 years risk (OR=2.00, 95% CI 1.02-3.90), contact with small ruminants (sheep and goats) (OR=2.36, 95%CI 1.06-5.25). <u>Coxiella</u> : contact with small ruminants (sheep and goats) (OR=7.07, 95%CI 2.04-24.50) |
| Ferreira-Junior[80] | Female sex workers                   | HIV, Treponema pallidum, hepatitis B and C                                                         | None identified.                                                                                                                                                                                                                                                         |
| Fragaszy[81]        | Swine workers                        | Influenza A virus (H1N1)pdm09                                                                      | None identified.                                                                                                                                                                                                                                                         |
| Geenen[82]          | Poultry workers                      | MRSA                                                                                               | None identified.                                                                                                                                                                                                                                                         |
| Geng[83]            | Abattoir workers (rabbit)            | Hepatitis E virus                                                                                  | None identified.                                                                                                                                                                                                                                                         |
| Gobet[84]           | Military forces                      | Mumps virus*                                                                                       | NA                                                                                                                                                                                                                                                                       |
| Goldstein[85]       | Water spray irrigators               | (Antibiotic-resistant)coagulase-negative staphylococci                                             | None identified.                                                                                                                                                                                                                                                         |

|                        |                                       |                                                               |                                                                                                                                                                                                           |
|------------------------|---------------------------------------|---------------------------------------------------------------|-----------------------------------------------------------------------------------------------------------------------------------------------------------------------------------------------------------|
| González[86]           | Female sex workers                    | Human papillomavirus                                          | Commercial sex work (RR=4.72, 95%CI 2.45-9.09)                                                                                                                                                            |
| Govender[87]           | Miners                                | Sporothrix schenckii *                                        | ≤3 years' mining (aOR=4.0, 95%CI 1.2-13.1)                                                                                                                                                                |
| Guerra[88]             | Military forces                       | Plasmodium ovale                                              | None identified.                                                                                                                                                                                          |
| Gutierrez Garitano[89] | Public institution workers            | Shigella sonnei*                                              | Canteen-food consumption (mOR=3.84, 95%CI 1.02-14.44)                                                                                                                                                     |
| Hargreaves[90]         | Female sex workers                    | HIV                                                           | None identified.                                                                                                                                                                                          |
| Harris[91]             | Military forces                       | Sarcoptes scabiei*                                            | NA                                                                                                                                                                                                        |
| Hatcher[92]            | Industrial hog operation workers      | Multidrug-resistant S. aureus (MDRSA)                         | None identified.                                                                                                                                                                                          |
| Hensen[93]             | Female sex workers                    | HIV                                                           | No/incomplete primary education versus incomplete secondary education (aOR=1.79, 95%CI 1.16-2.75); started selling sex aged 10 to 14 versus started selling sex aged 20 to 24 (aOR=2.51, 95%CI 1.42-4.43) |
| Hoan[94]               | Pig workers (abattoir, farm, vendors) | Hepatitis E virus                                             | None identified.                                                                                                                                                                                          |
| Hinjoy[95]             | Pig farmers                           | Hepatitis E virus                                             | Living in an area with frequent flooding (aOR=1.64, 95%CI 1.00-2.68), consuming intern pig organs more than twice per week (aOR=3.23, 95%CI 1.15-9.01)                                                    |
| Ho[96]                 | Military forces                       | Norovirus*                                                    | NA                                                                                                                                                                                                        |
| Huang[97]              | Poultry workers                       | Avian influenza viruses (H5N2 and H7N3)                       | Poultry workers whose workplaces were near locations where H5N2 outbreaks in poultry were reported (aOR=5.6, 95%CI 1.5-20.8)                                                                              |
| Huang[98]              | Male sex workers                      | HIV (=), Treponema pallidum (=)                               | HIV: Syphilis infection (aOR=9.0, 95%CI 2.4-33.5)                                                                                                                                                         |
| Huijbers[99]           | Poultry workers                       | Extended-spectrum/AmpC β-lactamase-producing Escherichia coli | Having diabetes or skin disease(s) (41.2% (yes) versus 15.8% (no); aOR=16.5; p=0.002), sampling in July–December 2010                                                                                     |



|              |                                 |                                                                                                                                        |                                                                                                                                                                                                                                                                                                                                                                                     |
|--------------|---------------------------------|----------------------------------------------------------------------------------------------------------------------------------------|-------------------------------------------------------------------------------------------------------------------------------------------------------------------------------------------------------------------------------------------------------------------------------------------------------------------------------------------------------------------------------------|
|              |                                 |                                                                                                                                        | (33.3% versus 7.8% in January-May 2011; aOR=13.0; p=0.002)                                                                                                                                                                                                                                                                                                                          |
| Hulin[100]   | Abattoir workers (poultry)      | Chlamydia psittaci                                                                                                                     | None identified.                                                                                                                                                                                                                                                                                                                                                                    |
| Hurtado[101] | Hoists and chains manufacturing | Coxiella burnetii*                                                                                                                     | NA                                                                                                                                                                                                                                                                                                                                                                                  |
| Hwang[102]   | Military forces                 | Adenovirus*                                                                                                                            | NA                                                                                                                                                                                                                                                                                                                                                                                  |
| Iser[103]    | Food processing plant workers   | Neisseria meningitidis C*                                                                                                              | Work at the processing plant (mOR=22, 95%CI 2.33-207.7), ≥ 20 people in work section (mOR=8, 95%CI 1.46-43.6).<br><u>Household factors:</u> no ventilation at home (mOR=14, 95%CI 1.07-176.4), >4 residents/house (mOR=8, 95%CI 1.01-62.8), ≥1 person in the same bed (mOR=12, 95%CI 1.24-115.4).                                                                                   |
| Isler[104]   | Services for homeless           | Mycobacterium tuberculosis                                                                                                             | None identified.                                                                                                                                                                                                                                                                                                                                                                    |
| Ismail[105]  | Gold mine workers               | Panton-Valentine leukocidin-producing methicillin-susceptible Staphylococcus aureus*                                                   | NA                                                                                                                                                                                                                                                                                                                                                                                  |
| Jahfari[106] | Forestry workers                | Borrelia miyamotoi                                                                                                                     | None identified.                                                                                                                                                                                                                                                                                                                                                                    |
| Jeger[107]   | Military forces                 | Influenza virus (H1N1)*                                                                                                                | NA                                                                                                                                                                                                                                                                                                                                                                                  |
| Jia[108]     | Female sex workers              | Human papillomavirus                                                                                                                   | Post-menopause (aOR=2.9, 95%CI 1.1-7.8)                                                                                                                                                                                                                                                                                                                                             |
| Jurke[109]   | Forestry workers                | Bartonella henselae, Borrelia burgdorferi, Francisella tularensis, Leptospira spp.(=), Hantavirus, tick-borne encephalitis virus (TBE) | <u>Bartonella:</u> >10 h/week in the woods during leisure time (aOR=1.54, 95%CI 1.07-2.24).<br><u>Borrelia:</u> gender (male) (aOR=5.28, 95%CI 2.39-11.67), working professionally in the forest (mainly outdoors) (aOR=2.54, 95%CI 1.45-4.46), being ≥ 50 years (aOR=2.02, 95%CI 1.14-3.58), more than 50 tick bites (aOR=2.04, 95%CI 1.39-2.99).<br><u>Hantavirus:</u> frequently |

|                  |                                                   |                                                   |                                                                                                                                                                                                                                                                                                                     |
|------------------|---------------------------------------------------|---------------------------------------------------|---------------------------------------------------------------------------------------------------------------------------------------------------------------------------------------------------------------------------------------------------------------------------------------------------------------------|
|                  |                                                   |                                                   | deploy mouse trap (aOR= 2.40, 95%CI 1.17–4.94). <u>Francisella</u> : hunting hares/other, mixed and no hunting (aOR=8.93, 95%CI 2.09–38.11), working > 10 h/week near water (aOR=3.78, 95%CI 1.36-10.51), having touched a mouse (aOR= 3.86, 95%CI 1.52-9.81). <u>TBE</u> : go diving (aOR= 6.29, 95%CI 1.40-28.29) |
| Kajon[110]       | Military forces                                   | Adenovirus 11a*                                   | NA                                                                                                                                                                                                                                                                                                                  |
| Kang[111]        | Farmers (swine)                                   | Hepatitis E virus                                 | Residence area (aOR= 1.97, 95%CI 1.26-3.09), contact with swine (aOR= 3.46, 95%CI 2.32-5.17), exposure to soil (aOR= 3.58, 95%CI: 2.12-6.03)                                                                                                                                                                        |
| Katelaris[112]   | Raspberry workers                                 | Leptospira borgpetersenii*                        | Interpreter required (aOR 4.00, 95%CI 1.63-9.86), saw rodents (aOR= 7.09, 95%CI 1.29-38.93)                                                                                                                                                                                                                         |
| Kato[113]        | Assembly-line workers, office clerks, technicians | Mumps virus*                                      | NA                                                                                                                                                                                                                                                                                                                  |
| Kayali[114]      | Poultry workers (chicken)                         | Avian Influenza viruses (H4 and H11) (=)          | None identified.                                                                                                                                                                                                                                                                                                    |
| Kayali[115]      | Poultry workers (turkey)                          | Avian influenza virus (H4/H5/H6/H7/H8/H9/H10) (=) | None identified.                                                                                                                                                                                                                                                                                                    |
| Kayali[116]      | Poultry workers (turkey)                          | Avian metapneumovirus                             | Meat-processing plant worker (aOR=4.1, 95%CI 1.3-13.1)                                                                                                                                                                                                                                                              |
| Kho[117]         | Animal farm workers                               | Rickettsia conorii, Rickettsia felis              | <u>R. conorii</u> : age over 50 years (43.6%, 95%CI 27.3%-59.9%) versus 41-50 years (7.7%, 95%CI 0.0%-16.4%, p=0.002). <u>R. felis</u> : age over 50 years (33.3%, 95%CI 17.9%-48.8%) versus ≤20 years old (5.4%±22.9%, p=0.015) and 31–40 years old (5.0%, 95%CI 0.0%-10.7%, p=0.009).                             |
| Khounvisith[118] | Pig farmers                                       | Hepatitis E virus                                 | Feeding of pigs (OR= 2.03, 95%CI 1.02- 4.05), age                                                                                                                                                                                                                                                                   |

|                   |                                                 |                                                                                                                                                           |                                                                                                                                                                                                                                                                                                                           |
|-------------------|-------------------------------------------------|-----------------------------------------------------------------------------------------------------------------------------------------------------------|---------------------------------------------------------------------------------------------------------------------------------------------------------------------------------------------------------------------------------------------------------------------------------------------------------------------------|
|                   |                                                 |                                                                                                                                                           | group 25–34 years (OR= 3.82, 95%CI 1.19–12.23)                                                                                                                                                                                                                                                                            |
| Khurelbaatar[119] | Avian or horse workers                          | Avian (=) and equine influenza virus A (=)                                                                                                                | NA                                                                                                                                                                                                                                                                                                                        |
| Kissling[120]     | Wool-processing factory workers                 | Bacillus anthracis                                                                                                                                        | Days working on machines processing raw goat hair without a mask (Prevalence ratio= 1.12, 95%CI 1.0-1.2, p=0.039)                                                                                                                                                                                                         |
| Klumb[121]        | Animal agriculture workers                      | Campylobacter spp., Cryptosporidium parvum, Shiga-toxin producing Escherichia coli (STEC) O157/non-(STEC) O157, non-typhoidal Salmonella enteretica (NTS) | Estimated cumulative incidence for people living and/or working on a farm per 10 000 population compared to other Minnesotans; for Campylobacter, 92.0 vs. 7.5 (p< 0.001); C. parvum, 23.8 vs. 1.2 (p< 0.001); NTS, 21.4 vs. 7.4 (p< 0.001); STEC O157, 5.4 vs. 1.1 (p< 0.001) and non-O157 STEC, 4.4 vs. 1.3 (p< 0.001). |
| Knust[122]        | Animal care workers (mice)                      | Lymphocytic choriomeningitis virus*                                                                                                                       | NA                                                                                                                                                                                                                                                                                                                        |
| Kobayashi[123]    | Airport workers                                 | Measles morbilivirus*                                                                                                                                     | NA                                                                                                                                                                                                                                                                                                                        |
| Krueger[124]      | Animal care workers (dogs)                      | Canine influenza (H3N8)(=)                                                                                                                                | NA                                                                                                                                                                                                                                                                                                                        |
| Krueger[125]      | Animal care workers (dogs)                      | Brucella canis                                                                                                                                            | Kennel employees (aOR= 2.7, 95% CI 1.3-5.8)                                                                                                                                                                                                                                                                               |
| Krumbholz[126]    | Pig farmers and slaughterers                    | Swine influenza viruses                                                                                                                                   | None identified.                                                                                                                                                                                                                                                                                                          |
| Krumbholz[127]    | Pig workers                                     | Hepatitis E virus                                                                                                                                         | Slaughterers (Prevalence= 41.7%, 95%CI 22.1–63.4, p=0.0090)                                                                                                                                                                                                                                                               |
| Kunwar[128]       | Military forces                                 | Dengue virus*                                                                                                                                             | NA                                                                                                                                                                                                                                                                                                                        |
| Kupferman[129]    | Abattoir workers                                | Leptospira interrogans*                                                                                                                                   | NA                                                                                                                                                                                                                                                                                                                        |
| Lagler[130]       | Military forces                                 | Hepatitis E virus                                                                                                                                         | Previous mission abroad (OR=2.49, 95%CI 1.74-3.58)                                                                                                                                                                                                                                                                        |
| Lan[131]          | Retail workers                                  | SARS-CoV-2 virus                                                                                                                                          | Direct customer exposure (aOR=5.1, 95% CI 1.1-24.8)                                                                                                                                                                                                                                                                       |
| Laroucau[132]     | Poultry workers(chicken)                        | Chlamydia psittaci*                                                                                                                                       | NA                                                                                                                                                                                                                                                                                                                        |
| Larson[133]       | Horse workers (veterinarians, breeders, others) | Equine influenza virus                                                                                                                                    | Having worked as an equine veterinarian (aOR= 14.0, 95%CI 2.6-75.9),                                                                                                                                                                                                                                                      |

|                  |                                                    |                                                        |                                                                                                                                                                                                                                                               |
|------------------|----------------------------------------------------|--------------------------------------------------------|---------------------------------------------------------------------------------------------------------------------------------------------------------------------------------------------------------------------------------------------------------------|
|                  |                                                    |                                                        | reporting a history of smoking (aOR=3.1, 95%CI 1.2-7.7), receipt of a seasonal influenza vaccine between 2000 and 2005 (aOR=2.3, 95%CI= 1.1-5.0)                                                                                                              |
| Lee[134]         | Swine farmers                                      | Hepatitis E virus                                      | Age (aOR=1.07 per year, 95%CI 1.05-1.09)                                                                                                                                                                                                                      |
| Lee[135]         | Military forces                                    | Salmonella non-typhi*                                  | NA                                                                                                                                                                                                                                                            |
| Li[136]          | Pig workers                                        | Methicillin-resistant coagulase-negative staphylococci | Frequency of pig contact (days per week) (mean ratio=1.92, 95%CI 1.62-2.27), duration of pig contact (years) (mean ratio=1.50, 95%CI 1.34-1.69)                                                                                                               |
| Li[137]          | Poultry workers (feed, slaughter and sell poultry) | Avian influenza virus (H9N2)                           | Male (aOR=1.6, 95%CI 1.2-2.8)                                                                                                                                                                                                                                 |
| Li[138]          | Factory workers                                    | Norovirus*                                             | Drinking from direct water disposal (Risk Ratio=3.0, 95%CI 1.7-5.3), contact with infected colleagues (Risk Ratio=6.1, 95%CI 3.4-11.0)                                                                                                                        |
| Li[139]          | Farmers                                            | Severe fever with thrombocytopenia syndrome virus      | Graving (aOR=17.98, 95%CI 4.35-74.26), grass mowing (aOR=14.05, 95%CI 5.53-35.70), raising cattle (aOR=11.51, 95%CI 2.18-60.67), time spent on farm work (aOR=3.24, 95%CI 1.49-7.05), tick bites (aOR=3.81, 95%CI 1.22-11.85), age (OR=1.88, 95%CI 1.27-2.78) |
| Liang[140]       | Swine farmers                                      | Hepatitis E virus                                      | Age 40-49 (OR=4.14, 95%CI 2.15-7.96), age 50-59 (OR=2.80, 95%CI 1.09-7.22), age ≥60 (OR= 6.75, 95%CI 2.60-17.54)                                                                                                                                              |
| Linkevicius[141] | Shipyard workers                                   | Streptococcus pneumoniae*                              | NA                                                                                                                                                                                                                                                            |
| Liu[142]         | Military recruits                                  | Influenza A and B virus*                               | NA                                                                                                                                                                                                                                                            |
| Liu[143]         | Military forces                                    | Ross river virus*                                      | NA                                                                                                                                                                                                                                                            |
| Lopes-João[144]  | Military forces                                    | Norovirus, Astrovirus, Sapovirus*                      | NA                                                                                                                                                                                                                                                            |

|                   |                             |                                          |                                                                                                                                                                                                                                                                                                                                                                         |
|-------------------|-----------------------------|------------------------------------------|-------------------------------------------------------------------------------------------------------------------------------------------------------------------------------------------------------------------------------------------------------------------------------------------------------------------------------------------------------------------------|
| López-Robles[145] | Swine workers               | Swine influenza virus (H3N2)             | Farms with high number of breeding herd (aOR=3.98, 95%CI 1.00-15.86)                                                                                                                                                                                                                                                                                                    |
| Lord[146]         | Abattoir workers            | Coxiella burnetii*                       | NA                                                                                                                                                                                                                                                                                                                                                                      |
| Ma[147]           | Swine workers               | Swine influenza virus (H3N2)             | Developed a respiratory illness during the last 12 months (aOR=3.2, 95%CI 1.2-8.2), seasonal H3N2 (aOR=4.8, 95%CI 2.2-10.8)                                                                                                                                                                                                                                             |
| Macdonald[148]    | Military forces             | Yersinia enterocolitica*                 | Consumption of mixed salad (aOR=10.26, 95%CI 0.85-123.57)                                                                                                                                                                                                                                                                                                               |
| Marinho[149]      | Recyclable waste collectors | Hepatitis B virus                        | Illicit drug use (Prevalence ratio=2.05, 95%CI 1.15-3.68), age over 40 years (Prevalence ratio=6.18, 95%CI 1.92-19.82)                                                                                                                                                                                                                                                  |
| Marinho[150]      | Recyclable waste collectors | Hepatitis C virus (=)                    | A history of STIs (aOR=6.7, 95% CI 1.2-36.5), unprotected sex with multiple partners (aOR=7.6, 95%CI 0.9-66.0)                                                                                                                                                                                                                                                          |
| Marra[151]        | Female sex workers          | Human papilloma virus                    | <u>Risk factors for vaginal hrHPV infection</u> : being under 25 years of age (p=0.010), being Dutch (p < 0.001), having an anal hrHPV infection (aOR=10.50, 95%CI 7.73-14.26)                                                                                                                                                                                          |
| Martins[152]      | Recyclable waste pickers    | Hepatitis E virus (=)                    | Age over 40 years (aOR=5.2, 95%CI 1.5-17.5)                                                                                                                                                                                                                                                                                                                             |
| Matos[153]        | Female sex workers          | Hepatitis B virus, Hepatitis C virus (=) | <u>Hepatitis B virus</u> : age (aOR=1.13, 95%CI 1.08-1.19), previous blood transfusion (aOR=3.16, 95%CI 1.15-8.69), cocaine use (aOR=4.54, 95%CI 2.01-10.28), single (aOR=3.80, 95%CI 1.69-8.54), ignoring burning pain during urination as a symptom of STI (aOR=2.57, 95%CI 1.14-5.78), ignoring genital ulcers/sores as a symptom of STI (aOR=3.47, 95%CI 1.58-7.58) |

|               |                    |                                 |                                                                                                                                                                                                                                                                                      |
|---------------|--------------------|---------------------------------|--------------------------------------------------------------------------------------------------------------------------------------------------------------------------------------------------------------------------------------------------------------------------------------|
| Mayet[154]    | Military forces    | Norovirus*                      | NA                                                                                                                                                                                                                                                                                   |
| Mayet[155]    | Military forces    | influenza A(H1N1)*              | NA                                                                                                                                                                                                                                                                                   |
| Mayet[156]    | Military forces    | Measles Morbillivirus*          | Age < 20 years (IRR=18.9, 95%CI 7.4-48.3), age 20-29 (IRR=8.3, 95%CI 3.9-18.0), age 30-39 years (IRR=2.8, 95%CI 1.2-6.4). Branch of armed forces: <u>navy</u> : IRR=1.8, 95%CI 1.0-3.1), <u>army</u> : IRR=1.9, 95%CI 1.2-3.0), <u>logistical services</u> : IRR=2.7, 95%CI 1.3-5.9) |
| Mbareche[157] | Swine workers      | Nasopharyngeal flora microbiota | Multivariate analysis: air samples and nasopharyngeal flora of pig workers cluster together, compared to the non-exposed control group. The significance was confirmed with the PERMANOVA statistical test (p=0.0001)                                                                |
| McCurdy[158]  | Farm workers       | Coccidioides immitis            | Self-reported dust exposure for most recent job (aOR=1.9, 95%CI 1.0-3.5), work with root and bulb vegetables in past year (aOR=3.0, 95%CI 1.2-7.1), work with carrots (aOR=2.9, 95%CI 1.0-8.6)                                                                                       |
| McKinnon[159] | Male sex workers   | HIV                             | Frequency of sex with male partners (aHR=1.33/sex act, 95%CI 1.01-1.75)                                                                                                                                                                                                              |
| McKinnon[160] | Female sex workers | HIV                             | Minimum charge/sex act (aHR=5.7, 95%CI 1.96-16.59 for high versus intermediate), N. gonorrhoeae infection (aHR=5.89, 95%CI 2.03-17.08), sex with casual clients during menses (aHR=6.19, 95% CI 2.58-14.84), Depo Provera use (aHR=5.12, 95% CI 1.98-13.22), estimated number        |

|                   |                                        |                                                                                                                    |                                                                                                                                                                                                                                                     |
|-------------------|----------------------------------------|--------------------------------------------------------------------------------------------------------------------|-----------------------------------------------------------------------------------------------------------------------------------------------------------------------------------------------------------------------------------------------------|
|                   |                                        |                                                                                                                    | of annual unprotected regular partner contacts (aHR=1.004, 95%CI 1.001-1.006)                                                                                                                                                                       |
| Méndez[161]       | Military forces                        | Trypanosoma cruzi (=)                                                                                              | NA                                                                                                                                                                                                                                                  |
| Mirzazadeh[162]   | Female sex workers                     | HIV, Treponema pallidum, Neisseria gonorrhoea, Chlamydia trachomatis, Trichomonas vaginalis, Human papilloma virus | <u>HIV</u> : Lifetime injection drug use (aOR=5.32, 95% CI 2.31-12.3); lifetime non-injection drug use (aOR=2.33, 95%CI 1.13-4.81); middle school and above education level versus illiterate (aOR=0.22, 95%CI 0.08-0.61)                           |
| Moayedi-Nia[163]  | Female sex workers                     | HIV, HCV, HBV, HSV, Treponema pallidum (=)                                                                         | <u>HIV infection</u> : being infected with HSV type1/type2 (aOR=5.13, 95% CI 1.0-27.76), being under 25 years of age (aOR=4.51, 95%CI 1.0-21.49)                                                                                                    |
| Mohd Ridzuan[164] | Plantation workers                     | Leptospira spp.                                                                                                    | The presence of cows in plantations (aOR=4.78, 95%CI 2.76-8.26), the presence of a landfill in plantations (aOR=2.04, 95%CI 1.22-3.40)                                                                                                              |
| Mol[165]          | Domestic and healthcare waste handlers | Hepatitis B virus, Hepatitis C virus                                                                               | <u>Hepatitis B</u> : age (aOR=1.06, 95%CI 1.02-1.11), current working time (years) (aOR=1.17, 95%CI 1.05-1.30)<br><u>Hepatitis C</u> : history of imprisonment (aOR=6.54, 95%CI 1.04-41.22)                                                         |
| Montuori[166]     | Wastewater workers                     | Hepatitis A virus (=)                                                                                              | Shellfish consumption and duration of employment were significantly associated with positivity (p<0.01 and p< 0.05, respectively). The interaction term (age x duration of employment) was significant (p< 0.001), age (aOR=2.68; 95% CI 1.48-4.85) |

|                   |                          |                         |                                                                                                                                                                                                                                                                                 |
|-------------------|--------------------------|-------------------------|---------------------------------------------------------------------------------------------------------------------------------------------------------------------------------------------------------------------------------------------------------------------------------|
| Mor[167]          | Male sex workers         | STI/HIV                 | <u>STI/HIV infection</u> : low-risk men who have sex with men (aOR=0.1, 95%CI 0.02-0.7, versus the reference male sex workers)                                                                                                                                                  |
| Mossong[168]      | Military forces          | Mumps orthorubulavirus* | NA                                                                                                                                                                                                                                                                              |
| Mostafavi[169]    | Animal husbandry workers | Coxiella burnetii       | Age > 50 years (OR=2.58, 95%CI 1.39-4.79), rural area of residence (OR=2.01, 95%CI 1.22-3.28), having little or no formal education (OR=7.78, 95%CI 3.29-18.39), keeping sheep or goats (OR=7.67, 95% CI 1.75-33.61), exposure to arthropod bites (OR = 2.34, 95% CI 1.39-3.96) |
| Mughini-Gras[170] | Swine workers            | Hepatitis E virus       | Ever been in Africa (aOR=2.20, 95%CI 1.06-4.53)                                                                                                                                                                                                                                 |
| Mulders[171]      | Abattoir workers         | MRSA                    | Working with live chickens: 'hanger' (aOR=11.27, 95%CI 4.18-30.43), conventional electric stunning (reference=CO <sub>2</sub> stunning) (aOR=4.36, 95%CI 1.55-12.26)                                                                                                            |
| Munseri[172]      | Police officers          | HIV (=)                 | NA                                                                                                                                                                                                                                                                              |
| Muraguri[173]     | Male sex workers         | STI/HIV                 | Male sex workers were significantly more likely than non-sex workers to report victimization to verbal (57.7% versus 23.1%, p<0.001), physical violence (15.1% versus 0.8%, p<0.001), sexual violence (10.0% versus 2.5%, p=0.013)                                              |
| Musyoki[174]      | Female sex workers       | HIV                     | <u>Unrecognized HIV infection</u> : Increasing age (30-34 years: aRR=2.4, 95%CI 1.3-4.3); 35-62 years (aRR=2.1, 95%CI 1.2-3.7), inconsistent condom use with paying clients (aRR=2.1, 95%CI                                                                                     |



|                                                                             |                           |                                                                               |                                                                                                                                                                                                                                                                       |
|-----------------------------------------------------------------------------|---------------------------|-------------------------------------------------------------------------------|-----------------------------------------------------------------------------------------------------------------------------------------------------------------------------------------------------------------------------------------------------------------------|
|                                                                             |                           |                                                                               | 1.4-3.0), use of a male condom as a method of contraception (aRR=2.5, 95%CI 1.7-3.5)                                                                                                                                                                                  |
| Mutagoma[175]                                                               | Female sex workers        | Treponema pallidum, HIV, Hepatitis B virus (=), Hepatitis C virus (=)         | <u>Positive association with syphilis/HIV co-infection:</u> age 25 years and older (aOR=1.82, 95% CI 1.33-2.50), having had a genital sore in the last 12 months (aOR=1.34, 95% CI 1.05-1.71), having HBsAg-positive test (aOR=2.09, 95%CI 1.08–4.08)                 |
| Narayanan[176]                                                              | Male sex workers          | HIV, HSV-2                                                                    | <u>HIV:</u> duration in sex work (aOR=1.08, 95%CI 1.03-1.13), Syphilis serology (aOR=3.83, 95%CI 1.36-10.79), HSV-2 status (aOR=12.92, 95%CI 7.00-23.84).<br><u>HSV-2:</u> duration in sex work (aOR=1.19, 95%CI 1.11-1.27), HIV status (aOR=10.70, 95%CI 5.63-20.33) |
| National Institute for Infectious Diseases, Shinjuku-ku, Tokyo, Japan [177] | Ship's stewards           | SARS-CoV-2*                                                                   | NA                                                                                                                                                                                                                                                                    |
| Navdarashvili[178]                                                          | Livestock workers         | Bacillus anthracis                                                            | Slaughtering animals (aOR=7.3, 95% CI 2.9-18.1), disposing of dead animals (aOR=13.6, 95%CI 1.5-119.8)                                                                                                                                                                |
| Neo[179]                                                                    | Military forces           | Norovirus (group I.7 and II.17)*, Sapovirus (group II.3)*                     | NA                                                                                                                                                                                                                                                                    |
| Ngoupa[180]                                                                 | Barbers                   | Hepatitis B virus (=)                                                         | NA                                                                                                                                                                                                                                                                    |
| Nguyen[181]                                                                 | Poultry workers (chicken) | Extended-spectrum $\beta$ -lactamase-producing -producing Escherichia coli(=) | Antimicrobial usage (during the month prior to the study visit) (aOR=2.52, 95%CI 1.08-5.87)                                                                                                                                                                           |
| Nicas[182]                                                                  | Construction workers      | Coccidioides immitis*                                                         | NA                                                                                                                                                                                                                                                                    |
| Nielsen[183]                                                                | Military forces           | Mumps orthorubulavirus*                                                       | NA                                                                                                                                                                                                                                                                    |
| Nielsen[184]                                                                | Livestock farming         | Coxiella burnetii                                                             | Living in rural areas (RR=2.6; 95% CI 1.9-3.5)                                                                                                                                                                                                                        |

|                     |                    |                                                |                                                                                                                                                                                                                                                                                                                                                                                                                                                                                                                                                                                                                                                    |
|---------------------|--------------------|------------------------------------------------|----------------------------------------------------------------------------------------------------------------------------------------------------------------------------------------------------------------------------------------------------------------------------------------------------------------------------------------------------------------------------------------------------------------------------------------------------------------------------------------------------------------------------------------------------------------------------------------------------------------------------------------------------|
| Nivesvivat[185]     | Military forces    | Methicillin-susceptible Staphylococcus Aureus* | <u>Risk factors of acquiring skin abscesses</u> : multiple erythematous papules (aOR=3.4, 95%CI 1.5-7.5), training in subunit 1 (aOR=32.6, 95%CI 4.1-260.6), training in subunit 2 (aOR=26.9, 95%CI 3.3-218.2)                                                                                                                                                                                                                                                                                                                                                                                                                                     |
| Okoye[186]          | Poultry workers    | Avian Influenza virus                          | Not identified.                                                                                                                                                                                                                                                                                                                                                                                                                                                                                                                                                                                                                                    |
| Oliveira-Filho[187] | Female sex workers | Hepatitis C virus                              | Up to elementary school versus high school or more (aOR=2.3, 95%CI 1.3-6.3); up to one minimum wage versus more than one minimum wage (aOR= 5.5, 95%CI 1.7-16.8); illicit drug use (injectable or inhaled) (aOR=9.4, 95%CI 3.9-19.5); unprotected sex (aOR=32.1, 95%CI 10.8-74.3); more than five sexual partners (aOR=2.5, 95%CI 1.3-4.2); condom exemption for clients paying extra (aOR=14.2, 95%CI 4.9-28.4); more than seven years working in the sex trade (aOR=4.6, 95%CI 1.8-7.6); Changes in genitalia (wart, wound, and/or itching) (aOR=3.2, 95%CI 1.2-6.0); did not perform medical/gynecological examination (aOR=4.5, 95%CI 1.7-8.2) |
| Oré[188]            | Military forces    | Leishmaniasis spp.*                            | Being male (aRisk Ratio= 4.01, 95%CI 1.11-14.42), not wearing long-sleeve clothes (aRisk Ratio=1.71, 95%CI 1.18- 2.50), sleeping in open rooms (aRisk ratio=1.80, 95%CI 1.16-2.79)                                                                                                                                                                                                                                                                                                                                                                                                                                                                 |
| Pang[189]           | Military forces    | Influenza A virus, Coxsackie/ ECHO virus       | <u>Febrile respiratory illness</u> : increasing age (aOR= 1.03,                                                                                                                                                                                                                                                                                                                                                                                                                                                                                                                                                                                    |

|                |                                |                                                                       |                                                                                                                                                                                                                                                                                                                                                                                                                                                                      |
|----------------|--------------------------------|-----------------------------------------------------------------------|----------------------------------------------------------------------------------------------------------------------------------------------------------------------------------------------------------------------------------------------------------------------------------------------------------------------------------------------------------------------------------------------------------------------------------------------------------------------|
|                |                                |                                                                       | 95% CI 1.01-1.05), recruit camp (aOR=4.67, 95% CI 3.99-5.46), smoking (aOR=1.31, 95% CI 1.13-1.52). <u>Influenza A(H1N1)pdm09</u> : Malay ethnicity (aOR=1.50, 95% CI 1.04-2.15). <u>Coxsackie/ECHO virus</u> : Malay ethnicity (aOR=1.67, 95% CI 1.19-2.36). <u>Contact risk factors for FRI</u> : stay-out personnel with ill household member (aOR=4.96, 95% CI 3.39-7.24), stay-in personnel with ill bunkmate and household member (aOR=3.55, 95% CI 2.57-4.91) |
| Park [190]     | Female sex workers (cisgender) | Chlamydia trachomatis, Neisseria gonorrhoeae, Trichomonas vaginalis   | <u>Chlamydia</u> : past year sex work initiation (aHR=2.7, 95%CI 1.3-6.0), <u>Gonorrhea</u> : past year sex work initiation (aHR=1.7, 95%CI 1.0-2.8), client sexual violence (aHR=2.9, 95%CI 1.2-7.1), <u>Trichomonas</u> : having female sexual partners (aHR=3.4, 95%CI 1.3-8.5)                                                                                                                                                                                   |
| Park[191]      | Military forces                | Respiratory Syncytial Virus*                                          | NA                                                                                                                                                                                                                                                                                                                                                                                                                                                                   |
| Parveen[192]   | Miners                         | Leptospira spp.                                                       | Water bodies on the way (OR=10.6, 95%CI 2.86-39.54), wet surroundings of mine (OR=10.6, 95%CI 2.54-40.63), rat infestation (OR=4.6, 95% CI 1.17-18.01), cattle in mine (OR=10.4, 95%CI 2.15-50.27)                                                                                                                                                                                                                                                                   |
| Patterson[193] | Female sex workers             | HIV, Treponema pallidum, Neisseria gonorrhoeae, Chlamydia trachomatis | <u>HIV or any STI</u> : spouse has been diagnosed or treated for an STI past six months (aOR=2.97, 95%CI 1.32-6.68), most or all clients are from elsewhere than Mexico (aOR=1.91, 95%CI 1.13-3.22)                                                                                                                                                                                                                                                                  |

|                |                                   |                                                                                      |                                                                                                                                                                                                                                                                                                                    |
|----------------|-----------------------------------|--------------------------------------------------------------------------------------|--------------------------------------------------------------------------------------------------------------------------------------------------------------------------------------------------------------------------------------------------------------------------------------------------------------------|
| Pawar[194]     | Poultry workers                   | Avian influenza (H9N2)                                                               | Male (aOR=1.6, 95%CI 1.2-2.8)                                                                                                                                                                                                                                                                                      |
| Pirnay[195]    | Military forces                   | SARS-CoV-2 virus*                                                                    | NA                                                                                                                                                                                                                                                                                                                 |
| Quan[196]      | Poultry workers                   | Avian influenza (H9N2, H7N9)                                                         | <u>H9N2 infection</u> : female (aOR=1.6, 95%CI 1.2-2.1); poultry seller (aOR=1.9, 95%CI 1.4-2.6).<br><u>H7N9 infection</u> : female (aOR=2.2, 95%CI 1.4-3.6); poultry seller (aOR=4.1, 95%CI 2.2-7.7)                                                                                                              |
| Rachiotis[197] | Municipal solid waste collectors  | Hepatitis A virus                                                                    | Age group > 42 years (aOR=22.57, 95%CI 7.29-69.88), education group ≤9 years (aOR=2.19, 95%CI 1.01-4.78), duration of employment ≥16 years (aOR=3.57, 95%CI 1.15-11.08)                                                                                                                                            |
| Ramos[198]     | Military forces                   | Streptococcus pyogenes*                                                              | Contact with another case (OR=6.92, 95%CI 3.60-13.30)                                                                                                                                                                                                                                                              |
| Raza[199]      | Military forces                   | Sarcoptes scabiei                                                                    | Itching in family/colleagues (aOR=95.41, 95%CI 9.97-912.91), changing clothes < 2 times/week (aOR=5.63, 95%CI 2.35-13.50), sharing beds (aOR=4.44, 95%CI 2.19-9.01), bathing < 1 time/day (aOR=4.32, 95%CI 2.25-8.29), low education (aOR=3.37, 95%CI 1.82-6.25), leave/temporary Duty (aOR=2.50, 95%CI 1.49-4.13) |
| Reeves[200]    | Military forces                   | Chikungunya virus*, Dengue virus*                                                    | NA                                                                                                                                                                                                                                                                                                                 |
| Remoli[201]    | Agricultural and forestry workers | Tick-borne encephalitis (=), Toscana virus (=), Usutu virus (=), West Nile virus (=) | NA                                                                                                                                                                                                                                                                                                                 |
| Ricci[202]     | Civil engineering                 | Legionella pneumophila                                                               | Age group ≥50 years (aOR=3.11, 95%CI 1.57-6.16), aquatic sports (swimming, fishing, rowing, and others) (aOR=                                                                                                                                                                                                      |

|                          |                           |                                                                                                     |                                                                                                                                                                                                                                                                                                                         |
|--------------------------|---------------------------|-----------------------------------------------------------------------------------------------------|-------------------------------------------------------------------------------------------------------------------------------------------------------------------------------------------------------------------------------------------------------------------------------------------------------------------------|
|                          |                           |                                                                                                     | 2.26, 95%CI 1.09-4.68)                                                                                                                                                                                                                                                                                                  |
| Richter[203]             | Poultry workers (turkeys) | MRSA                                                                                                | None identified.                                                                                                                                                                                                                                                                                                        |
| Ringhausen[204]          | Miners                    | Mycobacterium tuberculosis                                                                          | Age ≥80 years (aOR=5.8, 95%CI 2.04-16.26), foreign country of birth (aOR=6.8, 95%CI 1.91-24.0)                                                                                                                                                                                                                          |
| Rodkvamtook[205]         | Military forces           | Orientia tsutsugamushi*                                                                             | NA                                                                                                                                                                                                                                                                                                                      |
| Rosenberg Goldstein[206] | Spray irrigation workers  | MRSA (=), methicillin-susceptible <i>S. aureus</i> (=), VRE (=), vancomycin-susceptible enterococci | None identified.                                                                                                                                                                                                                                                                                                        |
| Rossow[207]              | Farming activities        | Francisella tularensis                                                                              | Pneumonic tularaemia: exposure to hay dust (aOR 6.6, 95%CI 1.9-25.4)                                                                                                                                                                                                                                                    |
| Royal[208]               | Military forces           | Coxiella burnetii                                                                                   | None identified.                                                                                                                                                                                                                                                                                                        |
| Sahibzada[209]           | Swine workers             | CA-MRSA ST93                                                                                        | Persons working with farrowing sows (aOR=6.39, 95%CI 1.23-39.36)                                                                                                                                                                                                                                                        |
| Sahneh[210]              | Rice farmers              | Leptospira spp.                                                                                     | Wet working environment (aOR=7.65, 95%CI 3.58-16.35), exposure to stagnant rice paddy water while having a skin scratch/injury (aOR=18, 95%CI 5.00-63.00); washing the face with stagnant rice paddy water (aOR=11.83, 95%CI 3.74-37.43), and sighting of rats or rat nest in rice paddies (aOR=3.61, 95%CI 1.14-11.35) |
| Sakamoto[211]            | Professional drivers      | Legionella spp.                                                                                     | 'Sometimes' use car air-conditioning (p=0.026, Fisher's exact probability)                                                                                                                                                                                                                                              |
| Sanchez[212]             | Military forces           | Norovirus*                                                                                          | Consumption of cake prepared by Norovirus infected food worker (aOR=10.1, 95%CI 1.2-81.6), pizza (aOR= 3.6, 95%CI 1.1-11.9)                                                                                                                                                                                             |
| Sánchez-Anguiano[213]    | Female sex workers        | Chlamydia trachomatis                                                                               | Consumption of alcohol (aOR=2.39, 95% CI 1.0-5.71)                                                                                                                                                                                                                                                                      |
| Santos[214]              | Sewer workers             | Histoplasma capsulatum*                                                                             | NA                                                                                                                                                                                                                                                                                                                      |
| Sargianou[215]           | Farm labourers (sheep)    | Crimean-Congo hemorrhagic                                                                           | Former tick bite (aOR=                                                                                                                                                                                                                                                                                                  |

|                    |                    |                       |                                                                                                                                                                                                                                                                                                                                                                                                                                                                                                                                                                                                                                                                      |
|--------------------|--------------------|-----------------------|----------------------------------------------------------------------------------------------------------------------------------------------------------------------------------------------------------------------------------------------------------------------------------------------------------------------------------------------------------------------------------------------------------------------------------------------------------------------------------------------------------------------------------------------------------------------------------------------------------------------------------------------------------------------|
|                    |                    | fever virus           | 18.3, 95%CI 2.22-151), agro-pastoral occupation (aOR=6.99, 95%CI 1.01-48.4), living at an altitude of $\geq$ 400 m (aOR= 17, 95% CI 2.48-117)                                                                                                                                                                                                                                                                                                                                                                                                                                                                                                                        |
| Schimmer[216]      | Dairy Goat Farmers | Coxiella burnetii     | $\geq$ 3 of daily goat-related tasks (milking, feeding, supply and removal, general animal health care, birth assistance) (aOR=3.73, 95%CI 2.00-6.94), lived as child on a ruminant farm (aOR= 2.24, 95%CI 1.17-4.28), presence of cat(s) in goat stable (aOR=2.54, 95%CI 1.24-5.21), distance residence to nearest stable $\leq$ 10 m (aOR=2.44, 95%CI 1.27-4.67), other goat breeds next to white dairy goat (aOR=3.38, 95%CI 1.61-7.09), combat other nuisance animals in 2008 via covering airspaces (aOR= 6.03, 95%CI 1.77-20.61), no farm boots for staff (aOR= 2.66, 95%CI 1.12-6.32), distance to nearest positive farm 0- <4 km (aOR=3.38, 95%CI 1.25-9.11) |
| Schønning [217]    | Paddy workers      | Leptospira spp.       | Paddy fields near to home (OR=2.14, 95%CI 1.25-3.66), worked in a marshy land and/or having marshy lands near to home and/or work (OR= 2.26, 95%CI 1.35-3.79)                                                                                                                                                                                                                                                                                                                                                                                                                                                                                                        |
| Şevketbeyoğlu[218] | Military forces    | Chlamydia pneumoniae* | NA                                                                                                                                                                                                                                                                                                                                                                                                                                                                                                                                                                                                                                                                   |
| Sharma[219]        | Military forces    | Hepatitis E virus*    | Consumption of juice with ice from juice shops (aOR=15.7, 95% CI 8.3-29.3)                                                                                                                                                                                                                                                                                                                                                                                                                                                                                                                                                                                           |

|                |                             |                                            |                                                                                                                                                                                                                                                                                                            |
|----------------|-----------------------------|--------------------------------------------|------------------------------------------------------------------------------------------------------------------------------------------------------------------------------------------------------------------------------------------------------------------------------------------------------------|
| Shaw[220]      | Abattoir workers (chicken)  | Chlamydia psittaci*                        | NA                                                                                                                                                                                                                                                                                                         |
| Shikova[221]   | Female sex workers          | Human papillomavirus (type 16, 31)         | Age > 30 years versus age ≤ 20 years (OR=0.22, 95%CI 0.07-0.66), non-smokers versus smokers (OR=0.25, 95%CI 0.11-0.54)                                                                                                                                                                                     |
| Shimizu[222]   | Live-poultry market workers | Avian Influenza A (H5N1)                   | None identified.                                                                                                                                                                                                                                                                                           |
| Steinberg[223] | Meat processing workers     | SARS-CoV-2 virus*                          | NA                                                                                                                                                                                                                                                                                                         |
| Sun[224]       | Hotel workers               | Legionella pneumophila                     | Legionella in cooling towers (OR=2.85, 95%CI 1.19-6.81), dissatisfaction with the indoor air quality (OR=2.05, 95%CI 1.13-3.71)                                                                                                                                                                            |
| Sun[225]       | Cattle farmers              | Coxiella burnetii                          | Milking cattle (aOR=1.88, 95%CI 1.21-2.94), general healthcare of cattle (aOR=2.40, 95%CI 1.46-3.93), birth assistance (aOR=2.07, 95%CI 1.31-3.27), contact raw milk (aOR=2.47, 95%CI 1.50-4.06), contact cattle manure (aOR=3.23, 95%CI 1.92-5.44), contact dead-born animals (aOR=3.45, 95%CI 2.16-5.50) |
| Sulaiman[226]  | Gold miners                 | Morbillivirus Measles*                     | NA                                                                                                                                                                                                                                                                                                         |
| Swai[227]      | Abattoir workers            | Brucella abortus                           | Slaughtering (aOR=5.74, 95%CI 1.25-25.22), cleaning (aOR=7.10, 95%CI 1.51-32.05)                                                                                                                                                                                                                           |
| Sweet[228]     | Female sex workers          | Human papilloma virus (type 35, 51 and 52) | HPV prevalence was notably higher in HIV-positive women (32.1%) compared to HIV-negative women (20.8%, p=0.03). The prevalence of high-risk HPV types was 27.4% in HIV-positive women and 18.2% in HIV-negative women (p=0.07).                                                                            |
| Tabibi[229]    | Animal breeders (cattle,    | Hepatitis E virus, Leptospira              | <u>Leptospira spp.</u> : cattle-                                                                                                                                                                                                                                                                           |

|                      |                                                     |                                                                                                                      |                                                                                                                                                                                 |
|----------------------|-----------------------------------------------------|----------------------------------------------------------------------------------------------------------------------|---------------------------------------------------------------------------------------------------------------------------------------------------------------------------------|
|                      | swine)                                              | spp., <i>Coxiella burnetii</i> , <i>Borrelia burgdorferi</i> (=), <i>Brucella</i> spp.(=), <i>Salmonella</i> spp.(=) | breeders (aOR=4.02, 95%CI 1.10,14.77)                                                                                                                                           |
| Tan[230]             | Military forces                                     | Influenza A virus (H1N1pdm09), Influenza B virus, Coxsackievirus*                                                    | NA                                                                                                                                                                              |
| Tang[231]            | Male sex workers                                    | HIV, <i>Treponema pallidum</i>                                                                                       | None identified.                                                                                                                                                                |
| Teague[232]          | Military forces                                     | <i>Staphylococcus aureus</i> *                                                                                       | NA                                                                                                                                                                              |
| Texeira[233]         | Swine workers                                       | Hepatitis E virus                                                                                                    | Having professions with exposure to pigs for more than 16.5 years (aOR=5.4, 95% CI 1.9-15.6)                                                                                    |
| Theamboonlers[234]   | Military forces                                     | Hepatitis A virus*                                                                                                   | NA                                                                                                                                                                              |
| Toepp[235]           | Hunting dog caretakers                              | <i>Borrelia burgdorferi</i>                                                                                          | None identified.                                                                                                                                                                |
| Torén[236]           | Welders                                             | <i>Streptococcus pneumoniae</i>                                                                                      | Occupational exposure to fumes (aOR=1.11, 95%CI 1.01- 1.21), silica dust (aOR=1.33, 95%CI 1.11-1.58)                                                                            |
| Torres-Gonzalez[237] | Dairy farm workers                                  | <i>Mycobacterium bovis</i>                                                                                           | High exposure activity (direct contact with livestock in closed spaces) (aOR=6.09, 95%CI 2.04-18.23)                                                                            |
| Toseva[238]          | Wastewater treatment workers                        | Hepatitis A virus                                                                                                    | Operators (OR=2.91, 95% CI 1.15-7.39), maintenance personnel (OR=4.3, 95% CI 1.08-17.17)                                                                                        |
| Traoré[239]          | Butchers(pork)                                      | Hepatitis E virus                                                                                                    | None identified.                                                                                                                                                                |
| Tschopp[240]         | Sewage workers                                      | Hepatitis E virus(=), <i>Helicobacter pylori</i> (=)                                                                 | None identified.                                                                                                                                                                |
| Vainio[241]          | Military forces                                     | <i>Streptococcus pneumoniae</i> *                                                                                    | None identified.                                                                                                                                                                |
| van Cleef[242]       | Abattoir workers(pigs)                              | MRSA                                                                                                                 | Working with live pigs (OR= 38.2, 95%CI 6.3-∞)                                                                                                                                  |
| van Cleef[243]       | Field workers (pigs, veal calves)                   | MRSA                                                                                                                 | <u>MRSA acquisition in relation to MRSA prevalence among farm animals</u> (per 10% increase in prevalence): pigs (aOR= 2.04, 95%CI 1.24-3.34), veal (aOR=1.28, 95%CI 1.06-1.53) |
| van Veen[244]        | Sex workers (female and male-to-female transgender) | HIV                                                                                                                  | Transgender sex work (aOR=22.9, 95%CI 6.5-80.3), ever injected drugs (aOR=31.1, 95%CI                                                                                           |



|                        |                                     |                                                                                               |                                                                                                                                                                                                                                                                                                                          |
|------------------------|-------------------------------------|-----------------------------------------------------------------------------------------------|--------------------------------------------------------------------------------------------------------------------------------------------------------------------------------------------------------------------------------------------------------------------------------------------------------------------------|
|                        |                                     |                                                                                               | 8.7-111.2), African ethnicity (aOR=19.0, 95% CI 3.2-111.8), South European ethnicity (aOR=7.2, 95%CI 1.2-42.0)                                                                                                                                                                                                           |
| Verhaegh-Haasnoot[245] | Male sex workers (internet escorts) | HIV, Chlamydia trachomatis, Neisseria gonorrhoeae, Treponema pallidum, Hepatitis B virus      | <u>For newly diagnosed STI:</u> 4-49 sex partners in the past 6 months (aOR=1.30, 95%CI 1.05-1.61), age 25 years and older versus < 25 years (aOR=0.68, 95%CI 0.54-0.85), positive STI history in the past 2 years (aOR=1.53, 95%CI 1.25-1.88), known to be HIV positive (aOR=2.53, 95%CI 1.86-3.43)                     |
| Vilay[246]             | Military forces                     | Plasmodium falciparum, Plasmodium vivax                                                       | Working duration in forest areas (years) (Mann-Whitney test, p=0.03)                                                                                                                                                                                                                                                     |
| Vorstere[247]          | Female sex workers                  | Human papillomavirus (type 6, 16, 18, 31, 33, 35, 39, 45, 51, 52, 53, 56, 58, 59, 66, 67, 68) | Age <21 years (OR=10.3, 95% CI 5.0-21.2)                                                                                                                                                                                                                                                                                 |
| Vu[248]                | Female sex workers                  | HIV, Treponema pallidum, HSV-2                                                                | <u>Factors associated with HIV infections:</u> age (continuous) (aOR=1.07, 95%CI 1.04-1.1), education (some Secondary versus some Primary) (aOR=0.6, 95%CI 0.4-0.9), personal income (TZS) from sex work (120,001-350,000 versus <120,001) (aOR=0.7, 95%CI 0.5-0.99), tested positive for HSV-2 (aOR=3.3, 95%CI 2.3-4.6) |
| Wadl[249]              | Military forces                     | Norovirus*                                                                                    | Salad consumption on 6 January (aOR=8.1, 95%CI 1.5-45.4) and 7 January (aOR=15.7, 95%CI 2.2-74.1), prepared by infected canteen employee                                                                                                                                                                                 |
| Wang[250]              | Poultry market workers              | Avian influenza A(H7N9)                                                                       | Female sex (aOR=2.71, 95% CI 1.1-6.71), ≥10 years of occupational                                                                                                                                                                                                                                                        |

|                     |                                             |                                                                       |                                                                                                                                                                                                                                                                                                                                                                                                                                                                                                                                               |
|---------------------|---------------------------------------------|-----------------------------------------------------------------------|-----------------------------------------------------------------------------------------------------------------------------------------------------------------------------------------------------------------------------------------------------------------------------------------------------------------------------------------------------------------------------------------------------------------------------------------------------------------------------------------------------------------------------------------------|
|                     |                                             |                                                                       | exposure (aOR=3.59, 95% CI 1.25-10.35)                                                                                                                                                                                                                                                                                                                                                                                                                                                                                                        |
| Wang[251]           | Female sex workers                          | Human papillomavirus (type 16, 52, 58)                                | Age 31-35 years versus $\leq$ 25 years (aOR=0.4, 95%CI 0.17-0.91). <u>Condom use:</u> occasionally versus always (aOR=3.01, 95%CI 1.73-5.23), never versus always (aOR=4.65, 95%CI 2.04-10.57)                                                                                                                                                                                                                                                                                                                                                |
| Watier-Grillot[252] | Military forces                             | Norovirus (genogroup II)*                                             | Consumption of infected shrimp salad (aOR=2.6, 95%CI 1.2-6.0), pasta salad (aOR= 2.9, 95%CI 1.3-6.4), mashed potatoes (aOR= 2.4, 95%CI 1.0-5.4)                                                                                                                                                                                                                                                                                                                                                                                               |
| Wickersham[253]     | Cisgender and Transgender Women Sex Workers | HIV, Treponema pallidum, Chlamydia trachomatis, Neisseria gonorrhoeae | None identified.                                                                                                                                                                                                                                                                                                                                                                                                                                                                                                                              |
| Wilczynski[254]     | Firefighters                                | Cryptosporidium parvum*                                               | Carrying or leading calves from the burning barn (Relative Risk=2.88, 95%CI 1.04-12.76)                                                                                                                                                                                                                                                                                                                                                                                                                                                       |
| Wilken[255]         | Television crew                             | Coccidioides immitis*                                                 | NA                                                                                                                                                                                                                                                                                                                                                                                                                                                                                                                                            |
| Williams[256]       | Poultry processing plant workers            | Chlamydia psittaci*                                                   | Worked in, or visited, killing or automated evisceration areas (aOR= 13.9, 95%CI 1.9-99.5). <u>Risk of recent infection because worked in, or visited killing or automated evisceration areas</u> , stratified for the use of eye protection (mOR=8.1, 95%CI 1.3-49.4). <u>Risk of recent infection by touching face with hands contaminated with viscera or blood</u> , stratified for the use of eye protection (mOR=5.0, 95%CI 1.08-22.9), and stratified for the use of respiratory protection with FFP3 mask (mOR= 6.5, 95%CI 1.4-30.1). |
| Wilson[257]         | Slaughterhouse and                          | Coxiella burnetii*                                                    | Passed through the stores                                                                                                                                                                                                                                                                                                                                                                                                                                                                                                                     |

|                   |                       |                                                               |                                                                                                                                                                                                                                                                                                                                                                                                                                        |
|-------------------|-----------------------|---------------------------------------------------------------|----------------------------------------------------------------------------------------------------------------------------------------------------------------------------------------------------------------------------------------------------------------------------------------------------------------------------------------------------------------------------------------------------------------------------------------|
|                   | cutting Plant workers |                                                               | (OR=3.2, 95%CI 1.7-6.3), passed through walkway 2 (OR=2.1, 95%CI 1.0-4.3), male gender (OR=5.2, 95%CI 1.1-24.0)                                                                                                                                                                                                                                                                                                                        |
| Wongsanuphat[258] | Factory workers       | Measles morbillivirus*                                        | NA                                                                                                                                                                                                                                                                                                                                                                                                                                     |
| Wu[259]           | Swine workers         | Swine influenza virus (H1N1)                                  | Age group 26-50 years (aOR=2.70, 95%CI 1.15-6.38)                                                                                                                                                                                                                                                                                                                                                                                      |
| Wu[260]           | Poultry workers       | Avian influenza virus (H9N2)                                  | Wholesale live poultry markets (OR=6.4, 95%CI 1.8-22.8), retail live poultry markets (OR=9.9, 95%CI 2.4-40.9)                                                                                                                                                                                                                                                                                                                          |
| Yang[261]         | Poultry workers       | Influenza virus A(H7N9)*                                      | NA                                                                                                                                                                                                                                                                                                                                                                                                                                     |
| Ye[262]           | Pig workers           | MDRSA (CC9, IEC-negative, tetracycline-resistant), MRSA (CC9) | <u>Carriage of MDRSA:</u><br>frequency of pig occupational contact(hours per day) < 8 (aPR=2.51, 95%CI 1.26-4.98), ≥ 8 (aPR=4.41, 95%CI 2.62-7.41).<br><u>Carriage of MRSA:</u><br>frequency of pig occupational contact(hours per day) <8 (aPR=5.11, 95%CI 2.16-12.09), ≥ 8 (aPR=9.54, 95%CI 4.77–19.06)                                                                                                                              |
| Ye[263]           | Livestock workers     | MRSA (CC9)                                                    | Contact with pig (aOR=6.58, 95%CI 3.50-12.38), contact with poultry (aOR=4.94, 95%CI 1.32-18.41), contact with other animal (aOR=4.50, 95%CI 0.88-22.98), frequency of livestock contact (h/d) (aOR=2.25, 95%CI 1.72-2.94), frequency of pig contact (h/d) (aOR=2.30, 95%CI 1.74-3.06), short-term duration of livestock contact (mo) (aOR=1.72, 95%CI 1.34-2.21), short-term duration of pig contact (mo) (aOR=1.75, 95%CI 1.34-2.28) |

|               |                                   |                                                                        |                                                                                                                                                                                         |
|---------------|-----------------------------------|------------------------------------------------------------------------|-----------------------------------------------------------------------------------------------------------------------------------------------------------------------------------------|
| Yoon[264]     | Military forces                   | Mycobacterium tuberculosis                                             | <u>Location (with the index cases)</u> : different floor in a same building (aOR=3.43, 95%CI 1.39-8.47), next room (aOR=5.19, 95%CI 2.34-11.52), same room aOR=10.93, 95%CI 4.93-24.25) |
| Younis[265]   | Poultry farm workers              | S. aureus, Candida albicans, Aspergillus flavus, Aspergillus fumigatus | None identified.                                                                                                                                                                        |
| Yu[266]       | Female sex workers                | HIV, Hepatitis C virus                                                 | None identified.                                                                                                                                                                        |
| Yu[267]       | Military forces                   | Adenovirus type 7*                                                     | NA                                                                                                                                                                                      |
| Zákutná[268]  | Agricultural and forestry workers | Borrelia burgdorferi                                                   | Men (OR=1.98, 95%CI 1.01-3.91), age > 30 years (OR=3.75, 95%CI 1.42-9.94)                                                                                                               |
| Zalla[269]    | Female sex workers                | HIV, Treponema pallidum                                                | None identified.                                                                                                                                                                        |
| Zermiani[270] | Female sex workers                | HIV, Hepatitis B virus, Hepatitis C virus (=), Treponema pallidum      | <u>Infection</u> : age (aOR=1 .07, 95%CI 1.01-1.14), recent immigration year (aOR= 0.88, 95%CI 0.79-0.98)                                                                               |

\*Outbreak or case series report; (=) No association found in the current study, NA=not applicable, aOR=adjusted Odds Ratio, mOR= Mantel-Haenszel Odds Ratio, aHR=adjusted Hazard Ratio, aPR= adjusted Prevalence Ratio, aRR=adjusted Relative Risk, aRisk ratio=adjusted Risk Ratio, IRR=Incidence Rate Ratio, STI: Sexually Transmitted Infections, MDRSA: Multidrug-Resistant S. aureus

#### References of the included articles

1. (2010). "Outbreak of 2009 pandemic influenza a (H1N1) on a Peruvian Navy ship - June-July 2009." *Morb Mortal Wkly Rep* 59(6): 162-165.
2. Abseno, M., et al. (2014). "Tuberculosis among Addis Ababa city bus drivers and cash collectors." *ETHIOP MED J(SUPPL. 1)*: 31-35.
3. Adjemian, J., et al. (2011). "Outbreak of Marburg hemorrhagic fever among miners in kamwenge and ibanda Districts, Uganda, 2007." *J INFECT DIS* 204(SUPPL. 3): S796-S799.
4. Alavi, S. M. and M. M. Khoshkho (2014). "Seroprevalence study of leptospirosis among rice farmers in khuzestan province, South west iran, 2012." *Jundishapur j. microbiology* 7(7): e11536.
5. Allard, A., et al. (2013). "Histoplasmosis outbreak associated with the renovation of an old house - Quebec, Canada, 2013." *Morb Mortal Wkly Rep* 62(51-52): 1041-1044.
6. Alonso, E., et al. (2015). "Q Fever Outbreak among Workers at a Waste-Sorting Plant." *PLoS ONE* 10(9): e0138817.
7. Alonso, E., et al. (2019). "A Q fever outbreak associated to courier transport of pets." *PLoS ONE* 14(11): e0225605.
8. Al-Sayyad, A. S., et al. (2011). "Mumps outbreak among military and police training camps in Bahrain: Epidemiology and evaluation of control measures." *Internet J Infect Dis* 10(1): 5.

9. Al-Thaqafy, M. S., et al. (2013). "Hepatitis B virus among Saudi National Guard Personnel: Seroprevalence and risk of exposure." *J Infect Public Health* 6(4): 237-245.
10. Alvarado, G. R., et al. (2020). "Symptom Characterization and Outcomes of Sailors in Isolation after a COVID-19 Outbreak on a US Aircraft Carrier." *JAMA Netw Open* 3(10).
11. Alvarado-Esquivel, C., et al. (2015). "Leptospira Exposure and Waste Pickers: A Case-Control Seroprevalence Study in Durango, Mexico." *J Clin Med Res* 7(8): 637-640.
12. Alvarado-Esquivel, C., et al. (2016). "High Seroprevalence of Leptospira Exposure in Meat Workers in Northern Mexico: A Case-Control Study." *J Clin Med Res* 8(3): 231-236.
13. Alvarado-Esquivel, C., et al. (2011). "Toxoplasma gondii infection in workers occupationally exposed to raw meat." *OCCUP MED* 61(4): 265-269.
14. Alvarado-Esquivel, C., et al. (2014). "Lack of association between Toxoplasma gondii infection and occupational exposure to animals." *Eur. j. microbiol. immunol.* 4(4): 184-192.
15. Ambrose, J., et al. (2014). "Large outbreak of Legionnaires' disease and Pontiac fever at a military base." *EPIDEMIOL INFECT* 142(11): 2336-2346.
16. Amsalu, A., et al. (2016). "The exposure rate to hepatitis B and C viruses among medical waste handlers in three government hospitals, southern Ethiopia." *Epidemiol Health* 38: e2016001.
17. Andriopoulos, P., et al. (2018). "Brucella seroprevalence in a high-risk population in Greece: A cross-sectional study." *Interdiscip Perspect Infect Dis* 2018: e8751921.
18. Ansari-Moghaddam, A., et al. (2016). "The prevalence of Hepatitis B Virus among municipal solidwaste workers: Necessity for immunization of at-risk groups." *Hepat Mon* 16(3): e30887.
19. Aquino, T. L., et al. (2014). "Influenza outbreak in a vaccinated population--USS Ardent, February 2014." *MMWR Morb Mortal Wkly Rep* 63(42): 947-949.
20. Archer, B. N., et al. (2011). "Outbreak of Rift Valley fever affecting veterinarians and farmers in South Africa, 2008." *S AFR MED J* 101(4): 263-266.
21. Armstrong, P. A., et al. (2018). "Outbreak of Severe Histoplasmosis among Tunnel Workers - Dominican Republic, 2015." *CLIN INFECT DIS* 66(10): 1550-1557.
22. Awah-Ndukum, J., et al. (2018). "Seroprevalence and risk factors of brucellosis among slaughtered indigenous cattle, abattoir personnel and pregnant women in Ngaoundere, Cameroon." *BMC Infect Dis* 18(1): 611.
23. Awosanya, E. J., et al. (2013). "Factors associated with probable cluster of Leptospirosis among kennel workers in Abuja, Nigeria." *Pan Afr Med J* (16): 144.
24. Bailey, M. S., et al. (2012). "Outbreak of zoonotic cutaneous leishmaniasis with local dissemination in Balkh, Afghanistan." *J R Army Med Corps* 158(3): 225-228.
25. Bansal, M., et al. (2017). "Seroepidemiology and molecular characterization of hepatitis E virus infection in swine and occupationally exposed workers in Punjab, India." *Zoonoses Public Health* 64(8): 662-672.
26. Banta, J., et al. (2016). "Notes from the Field: Outbreak of Hand, Foot, and Mouth Disease Caused by Coxsackievirus A6 Among Basic Military Trainees - Texas, 2015." *MMWR Morb Mortal Wkly Rep* 65(26): 678-680.
27. Baral, S., et al. (2014). "Reconceptualizing the HIV epidemiology and prevention needs of female sex workers (FSW) in Swaziland." *PLoS ONE* 9(12): e115465.

28. Barnhart, D. A., et al. (2019). "Structural, interpersonal, psychosocial, and behavioral risk factors for HIV acquisition among female bar workers in Dar es Salaam, Tanzania." *AIDS CARE PSYCHOL SOCIO-MED ASP AIDS HIV* 31(9): 1096-1105.
29. Beaudoin, A., et al. (2010). "Serologic survey of swine workers for exposure to H2N3 swine influenza A." *Influ Other Respir Viruses* 4(3): 163-170.
30. Beheshti, S., et al. (2010). "Seroprevalence of brucellosis and risk factors related to high risk occupational groups in Kazeroon, South of Iran." *Int J Occup Environ Med* 1(2): 62-68.
31. Bellali, H., et al. (2017). "Zoonotic Cutaneous Leishmaniasis Prevalence Among Farmers in Central Tunisia, 2014." *J Agromedicine* 22(3): 244-250.
32. Bernier, A., et al. (2020). "HIV and other sexually transmitted infections among female sex workers in Moscow (Russia): prevalence and associated risk factors." *Sex Transm Infect Mar* (18) pii: sextrans-2019-054299.
33. Beste, L. A., et al. (2019). "Prevalence of Hepatitis B Virus Exposure in the Veterans Health Administration and Association With Military-related Risk Factors." *Clin Gastroenterol Hepatol Aug* (5): eS1542-3565.
34. Bilman, F. B., et al. (2017). "Epidemiological analysis using pulsed-field gel electrophoresis of Salmonella enteritidis outbreak in factory workers." *Jundishapur J Microbiol* 10(9): e14144.
35. Birku, T., et al. (2015). "Prevalence of hepatitis B and C viruses infection among military personnel at Bahir Dar Armed Forces General Hospital, Ethiopia." *BMC Res Notes* 8: 737.
36. Boost, M. V., et al. (2015). "Prevalence of carriage and characterisation of methicillin-resistant Staphylococcus aureus in slaughter pigs and personnel exposed to pork carcasses." *Hong Kong Med J* 21(6): S36-S40.
37. Borkenhagen, L. K., et al. (2019). "High Risk of Influenza Virus Infection Among Swine Workers: Examining a Dynamic Cohort in China." *CLIN INFECT DIS XX(XX)*: 1–8.
38. Boscarino, J. A., et al. (2014). "Risk factors for hepatitis C infection among Vietnam era veterans versus nonveterans: results from the Chronic Hepatitis Cohort Study (CHeCS)." *J Community Health* 39(5): 914-921.
39. Boyce, S. C., et al. (2020). "HIV Infection and Risk Heightened Among Female Sex Workers Who Entered the Sex Trade as Adolescents in Guatemala." *AIDS and Behavior April* (10): 10.1007/s10461-020-02841-1.
40. Brinker, A. J. and D. L. Blazes (2017). "An outbreak of Leptospirosis among United States military personnel in Guam." *Trop Dis Travel Med Vaccines* 3(1): 1-4.
41. Brooks, J., et al. (2012). "No evidence of cross-species transmission of mouse retroviruses to animal workers exposed to mice." *TRANSFUSION* 52(2): 317-325.
42. Brosh-Nissimov, T., et al. (2018). "An Outbreak of Microsporium canis infection at a military base associated with stray cat exposure and person-to-person transmission." *MYCOSES* 61(7): 472-476.
43. Cárcamo, C. P., et al. (2012). "Prevalences of sexually transmitted infections in young adults and female sex workers in Peru: A national population-based survey." *Lancet Infect Dis* 12(10): 765-773.
44. Carpentier, A., et al. (2012). "High hepatitis E virus seroprevalence in forestry workers and in wild boars in France." *J CLIN MICROBIOL* 50(9): 2888-2893.

45. Caruso, C., et al. (2017). "Hepatitis E Virus: A Cross-Sectional Serological and Virological Study in Pigs and Humans at Zoonotic Risk within a High-Density Pig Farming Area." *Transbound Emerg Dis* 64(5): 1443-1453.
46. Cassir, N., et al. (2020). "Outbreak of pneumococcal pneumonia among shipyard workers in Marseille, France, January to February 2020." *Eurosurveillance* 25(11): 2000162.
47. Cavaretto, L., et al. (2018). "Epidemiological and molecular analysis of hepatitis B virus infection in manicurists in Central Brazil." *J MED VIROL* 90(2): 277-281.
48. Chabata, S. T., et al. (2019). "Changes Over Time in HIV Prevalence and Sexual Behaviour Among Young Female Sex-Workers in 14 Sites in Zimbabwe, 2013-2016." *AIDS Behav* 23(6):1494-1507.
49. Chapman, A. S., et al. (2011). "Norovirus outbreak associated with person-to-person transmission, U.S. Air Force Academy, July 2011." *MSMR* 18(11): 2-5.
50. Chaudhry, M., et al. (2020). "Avian influenza at animal-human interface: One-health challenge in live poultry retail stalls of Chakwal, Pakistan." *Influ Other Respir Viruses* 14(3):257-265.
51. Chaussade, H., et al. (2013). "Hepatitis E virus seroprevalence and risk factors for individuals in working contact with animals." *J Clin Virol* 58(3): 504-508.
52. Chen, M., et al. (2017). "An emm5 group A streptococcal outbreak among workers in a factory manufacturing telephone accessories." *Front Microbiol* 8(JUN): 1156.
53. Cheng, J., et al. (2016). "Epidemiology and transmission characteristics of human adenovirus type 7 caused acute respiratory disease outbreak in military trainees in east China." *Am J Transl Res* 8(5): 2331-2342.
54. Choi, M. J., et al. (2015). "Live Animal Markets in Minnesota: A Potential Source for Emergence of Novel Influenza A Viruses and Interspecies Transmission." *CLIN INFECT DIS* 61(9): 1355-1362.
55. Coman, A., et al. (2013). "Serological evidence for avian H9N2 influenza virus infections among Romanian agriculture workers." *J Infect Public Health* 6(6): 438-447.
56. Cook, E. A. J., et al. (2017). "Risk factors for leptospirosis seropositivity in slaughterhouse workers in western Kenya." *OCCUP ENVIRON MED* 74(5): 357-365.
57. Cook, E. A. J., et al. (2017). "The sero-epidemiology of Rift Valley fever in people in the Lake Victoria Basin of western Kenya." *PLoS Negl Trop Dis* 11(7): e0005731.
58. Cosby, M. T., et al. (2013). "Outbreak of H3N2 influenza at a US military base in Djibouti during the H1N1 pandemic of 2009." *PLoS ONE* 8(12): e82089.
59. Cowan, J. B. and T. S. Davis (2012). "Varicella outbreak among Afghan National Civil Order Police recruits-Herat Regional Military Training Center, Herat, Afghanistan, 2010." *MIL MED* 177(8): 924-927.
60. Crowell, T. A., et al. (2017). "Stigma, access to healthcare, and HIV risks among men who sell sex to men in Nigeria." *J Int AIDS Soc* 20(1): e 21489.
61. Crucitti, T., et al. (2010). "Trichomonas vaginalis is highly prevalent in adolescent girls, pregnant women, and commercial sex workers in Ndola, Zambia." *SEX TRANSM DIS* 37(4): 223-227.
62. Cui, W., et al. (2016). "Hepatitis E seroprevalence and related risk factors among seafood processing workers: A cross-sectional survey in Shandong Province, China." *Int J Infect Dis* 49: 62-66.
63. Cummings, K. C., et al. (2010). "Point-source outbreak of coccidioidomycosis in construction workers." *EPIDEMIOL INFECT* 138(4): 507-511.



64. Das, R., et al. (2012). "Occupational coccidioidomycosis in California: Outbreak investigation, respirator recommendations, and surveillance findings." *J OCCUP ENVIRON MED* 54(5): 564-571.
65. De Keukeleire, M., et al. (2016). "Individual and environmental factors associated with the seroprevalence of *Borrelia burgdorferi* in Belgian farmers and veterinarians." *Infect Ecol Epidemiol* 6: 32793.
66. De Keukeleire, M., et al. (2018). "Seroprevalence of *Borrelia burgdorferi* in Belgian forestry workers and associated risk factors." *Parasit Vectors* 11(1): 277.
67. De Lange, M. M. A., et al. (2014). "Coxiella burnetii seroprevalence and risk factors in sheep farmers and farm residents in the Netherlands." *EPIDEMIOLOGICAL INFECT* 142(6): 1231-1244.
68. De Laval, F., et al. (2011). "Severe norovirus outbreak among soldiers in the field: Foodborne followed by person-to-person transmission." *CLIN INFECT DIS* 53(4): 399-400.
69. De Marco, M. A., et al. (2013). "Evidence of cross-reactive immunity to 2009 pandemic influenza A virus in workers seropositive to swine H1N1 influenza viruses circulating in Italy." *PLoS ONE* 8(2): e57576.
70. De Souza, R. L., et al. (2020). "Prevalence of syphilis in female sex workers in three countryside cities of the state of Pará, Brazilian Amazon." *BMC Infect Dis* 20(1): 129.
71. Delgado Naranjo, J., et al. (2011). "Study and management of a Q fever outbreak among machine tool workers in the basque country (Spain)." *Epidemiol Res Intern* 2011: e136946.
72. Di Renzi, S., et al. (2010). "Risk of acquiring tick-borne infections in forestry workers from Lazio, Italy." *EUR J CLIN MICROBIOL INFECT DIS* 29(12): 1579-1581.
73. Diabate, S., et al. (2018). "Gonorrhoea, Chlamydia and HIV incidence among female sex workers in Cotonou, Benin: A longitudinal study." *PLoS ONE* 13(5): e0197251.
74. Dongliu, Y., et al. (2016). "Outbreak of acute febrile respiratory illness caused by human adenovirus B P14H11F14 in a military training camp in Shandong China." *Arch Virol* 161(9): 2481-2489.
75. Dreyfus, A., et al. (2014). "Sero-prevalence and risk factors for leptospirosis in abattoir workers in New Zealand." *Int J Environ Res Public Health* 11(2): 1756-1775.
76. Dreyfus, A., et al. (2015). "Risk of infection and associated influenza-like disease among abattoir workers due to two *Leptospira* species." *EPIDEMIOLOGICAL INFECT* 143(10): 2095-2105.
77. Duggan, J. M., et al. (2017). "A seroprevalence study to determine the frequency of hantavirus infection in people exposed to wild and pet fancy rats in England." *EPIDEMIOLOGICAL INFECT* 145(12): 2458-2465.
78. Eassa, S. M., et al. (2016). "Risk Factors Associated with Parasitic Infection among Municipality Solid-Waste Workers in an Egyptian Community." *J PARASITOL* 102(2): 214-221.
79. Esmaeili, S., et al. (2019). "Seroepidemiological study of Q fever, brucellosis and tularemia in butchers and slaughterhouses workers in Lorestan, western of Iran." *Comp Immunol Microbiol Infect Dis* 66: e101322.
80. Ferreira-Junior, O. D. C., et al. (2018). "Prevalence estimates of HIV, syphilis, hepatitis B and C among female sex workers (FSW) in Brazil, 2016." *MEDICINE* 97(15): S3-S8.
81. Fragaszy, E., et al. (2016). "Increased risk of A(H1N1)pdm09 influenza infection in UK pig industry workers compared to a general population cohort." *Influ Other Respir Viruses* 10(4): 291-300.



82. Geenen, P. L., et al. (2013). "Prevalence of livestock-associated MRSA on Dutch broiler farms and in people living and/or working on these farms." *EPIDEMIOL INFECT* 141(5): 1099-1108.
83. Geng, Y., et al. (2019). "High seroprevalence of hepatitis E virus in rabbit slaughterhouse workers." *Transboundary Emer Dis* 66: 1085–1089.
84. Gobet, A., et al. (2014). "Mumps among highly vaccinated people: Investigation of an outbreak in a French Military Parachuting Unit, 2013." *J INFECT* 68(1): 101-102.
85. Goldstein, R. R., et al. (2017). "Higher prevalence of coagulase-negative staphylococci carriage among reclaimed water spray irrigators." *Sci Total Environ* 595: 35-40.
86. González, C., et al. (2011). "Higher incidence and persistence of high-risk human papillomavirus infection in female sex workers compared with women attending family planning." *Int J Infect Dis* 15(10): e688-e694.
87. Govender, N. P., et al. (2015). "An Outbreak of Lymphocutaneous Sporotrichosis among Mine-Workers in South Africa." *PLoS Negl Trop Dis* 9(9): e0004096.
88. Guerra, R. I., et al. (2019). "A cluster of the first reported *Plasmodium ovale* spp. infections in Peru occurring among returning un peace-keepers, a review of epidemiology, prevention and diagnostic challenges in nonendemic regions." *Malar J* 18(1): 176.
89. Gutierrez Garitano, I., et al. (2011). "Shigellosis outbreak linked to canteen-food consumption in a public institution: a matched case-control study." *EPIDEMIOL INFECT* 139(12): 1956-1964.
90. Hargreaves, J. R., et al. (2016). "Cohort analysis of program data to estimate HIV incidence and uptake of HIV-related services among female sex workers in Zimbabwe, 2009-2014." *J ACQUIRED IMMUNE DEFIC SYNDR* 72(1): e1-e8.
91. Harris, P. N. A., et al. (2016). "An outbreak of scrub typhus in military personnel despite protocols for antibiotic prophylaxis: doxycycline resistance excluded by a quantitative PCR-based susceptibility assay." *Microbes Infect* 18(6): 406-411.
92. Hatcher, S. M., et al. (2017). "The prevalence of antibiotic-resistant *Staphylococcus aureus* nasal carriage among industrial hog operation workers, community residents, and children living in their households: North Carolina, USA." *ENVIRON HEALTH PERSPECT* 125(4): 560-569.
93. Hensen, B., et al. (2019). "HIV risk among young women who sell sex by whether they identify as sex workers: analysis of respondent-driven sampling surveys, Zimbabwe, 2017." *J Int AIDS Soc* 22(12).
94. Hoan, N. X., et al. (2019). "High Hepatitis e virus (HEV) Positivity among Domestic Pigs and Risk of HEV Infection of Individuals Occupationally Exposed to Pigs and Pork Meat in Hanoi, Vietnam." *Open Forum Infect Dis* 6(9): 1-7.
95. Hinjoy, S., et al. (2013). "A cross-sectional study of hepatitis E virus infection in healthy people directly exposed and unexposed to pigs in a rural community in northern Thailand." *Zoonoses Public Health* 60(8): 555-562.
96. Ho, Z. J. M., et al. (2015). "Emergence of norovirus GI.2 outbreaks in military camps in Singapore." *Int J Infect Dis* 31: e23-e30.
97. Huang, S. Y., et al. (2015). "Serological comparison of antibodies to avian influenza viruses, subtypes H5N2, H6N1, H7N3 and H7N9 between poultry workers and non-poultry workers in Taiwan in 2012." *EPIDEMIOL INFECT* 143(14): 2965-2974.

98. Huang, Y., et al. (2016). "Changes in prevalence of HIV or syphilis among male sex workers and non-commercial men who have sex with men in Shenzhen, China: Results of a second survey." *PLoS ONE* 11(12).
99. Huijbers, P. M. C., et al. (2014). "Extended-spectrum and AmpC  $\beta$ -lactamase-producing *Escherichia coli* in broilers and people living and/or working on broiler farms: Prevalence, risk factors and molecular characteristics." *J Antimicrob Chemother* 69(10): 2669-2675.
100. Hulin, V., et al. (2015). "Host preference and zoonotic potential of *Chlamydia psittaci* and *C. gallinacea* in poultry." *Pathogens Dis* 73(1): 1-11.
101. Hurtado, A., et al. (2017). "Environmental sampling coupled with real-time PCR and genotyping to investigate the source of a Q fever outbreak in a work setting." *EPIDEMIOLOGICAL INFECTION* 145(9): 1834-1842.
102. Hwang, S. M., et al. (2013). "Outbreak of febrile respiratory illness caused by adenovirus at a south Korean military training facility: Clinical and radiological characteristics of adenovirus pneumonia." *Jpn J Infect Dis* 66(5): 359-365.
103. Iser, B. P. M., et al. (2012). "Outbreak of *Neisseria meningitidis* C in workers at a large food-processing plant in Brazil: Challenges of controlling disease spread to the larger community." *EPIDEMIOLOGICAL INFECTION* 140(5): 906-915.
104. Isler, M. A., et al. (2013). "Screening employees of services for homeless individuals in Montreal for tuberculosis infection." *J Infect Public Health* 6(3): 209-215.
105. Ismail, H., et al. (2020). "An outbreak of cutaneous abscesses caused by Pantone-Valentine leukocidin-producing methicillin-susceptible *Staphylococcus aureus* among gold mine workers, South Africa, November 2017 to March 2018." *BMC Infect Dis* 20(1).
106. Jahfari, S., et al. (2014). "High seroprevalence of *Borrelia miyamotoi* antibodies in forestry workers and individuals suspected of human granulocytic anaplasmosis in the Netherlands." *New Microbes New Infect* 2(5): 144-149.
107. Jeger, V., et al. (2011). "H1N1 outbreak in a Swiss military boot camp—observations and suggestions." *Swiss Med Wkly* 141: w13307.
108. Jia, H., et al. (2015). "Human papillomavirus infection and cervical dysplasia in female sex workers in Northeast China: an observational study." *BMC Public Health* 15: 695.
109. Jurke, A., et al. (2015). "Serological survey of *Bartonella* spp., *Borrelia burgdorferi*, *Brucella* spp., *Coxiella burnetii*, *Francisella tularensis*, *Leptospira* spp., *Echinococcus*, Hanta-, TBE- and XMR-virus infection in employees of two forestry enterprises in North Rhine-Westphalia, Germany, 2011-2013." *Int J Med Microbiol* 305(7): 652-662.
110. Kajon, A. E., et al. (2010). "Outbreak of Febrile Respiratory Illness Associated with Adenovirus 11a Infection in a Singapore Military Training Camp." *J CLIN MICROBIOL* 48(4): 1438-1441.
111. Kang, Y. H., et al. (2017). "Hepatitis E virus seroprevalence among farmers, veterinarians and control subjects in Jilin province, Shandong province and Inner Mongolia Autonomous Region, China." *J MED VIROL* 89(5): 872-877.
112. Katelaris, A. L., et al. (2019). "Investigation and response to an outbreak of leptospirosis among raspberry workers in Australia, 2018." *Zoonoses Public Health* 67(1): 35-43.

113. Kato, H., et al. (2020). "Rubella outbreak among workers in three small- and medium-size business establishments associated with imported genotype 1E rubella virus—Shizuoka, Japan, 2015." *VACCINE* 38(46): 7278-7283.
114. Kayali, G., et al. (2011). "Evidence of infection with H4 and H11 avian influenza viruses among Lebanese chicken growers." *PLoS ONE* 6(10): e26818.
115. Kayali, G., et al. (2010). "Evidence of previous avian influenza infection among US Turkey workers." *Zoonoses Public Health* 57(4): 265-272.
116. Kayali, G., et al. (2011). "Serologic evidence of Avian metapneumovirus infection among adults occupationally exposed to Turkeys." *Vector Borne Zoonotic Dis* 11(11): 1453-1458.
117. Kho, K. L., et al. (2017). "Rickettsial seropositivity in the indigenous community and animal farm workers, and vector surveillance in Peninsular Malaysia." *Emerg Microbes Infect* 6(4): e18.
118. Khounvisith, V., et al. (2018). "High circulation of Hepatitis E virus in pigs and professionals exposed to pigs in Laos." *Zoonoses Public Health* 65(8): 1020-1026.
119. Khurelbaatar N, et al. (2014) Little Evidence of Avian or Equine Influenza Virus Infection among a Cohort of Mongolian Adults with Animal Exposures, 2010–2011. *PLoS ONE* 9(1): e85616.
120. Kissling, E., et al. (2012). "B. anthracis in a wool-processing factory: Seroprevalence and occupational risk." *EPIDEMIOLOGICAL INFECTION* 140(5): 879-886.
121. Klumb, C. A., et al. (2020). "Animal agriculture exposures among Minnesota residents with zoonotic enteric infections, 2012-2016." *EPIDEMIOLOGICAL INFECTION* 148: e55.
122. Knust, B., et al. (2014). "Lymphocytic choriomeningitis virus in employees and mice at multipremises feeder-rodent operation, United States, 2012." *Emerg Infect Dis* 20(2): 240-247.
123. Kobayashi, A., et al. (2020). "Epidemiology of a workplace measles outbreak dominated by modified measles cases at Kansai international airport, Japan, during august–september 2016." *VACCINE* 38(32): 4996-5001.
124. Krueger, W. S., et al. (2014). "No evidence for zoonotic transmission of H3N8 canine influenza virus among US adults occupationally exposed to dogs." *Influenza Other Respir Viruses* 8(1): 99-106.
125. Krueger, W. S., et al. (2014). "Evidence for Unapparent *Brucella canis* Infections among Adults with Occupational Exposure to Dogs." *Zoonoses Public Health* 61(7): 509-518.
126. Krumbholz, A., et al. (2010). "Prevalence of antibodies to swine influenza viruses in humans with occupational exposure to pigs, Thuringia, Germany, 2008-2009." *J MED VIROLOGY* 82(9): 1617-1625.
127. Krumbholz, A., et al. (2012). "Prevalence of hepatitis E virus-specific antibodies in humans with occupational exposure to pigs." *Medical Microbiology Immunology* 201(2): 239-244.
128. Kunwar, C. R. and R. Prakash (2015). "Dengue outbreak in a large military station: Have we learnt any lesson?" *Medical Journal Armed Forces India* 71(1): 11-14.
129. Kupferman, T., et al. (2017). "Case Report: A Cluster of Three Leptospirosis Cases in a New York City Abattoir and an Unusual Complication in the Index Case." *AM J TROPICAL MEDICAL AND HYGIENE* 97(6): 1679-1681.
130. Lagler, H., et al. (2014). "Hepatitis E virus seroprevalence in austrian adults: A nationwide cross-sectional study among civilians and military professionals." *PLoS ONE* 9(2): e87669.

131. Lan F.Y., et al. (2020). "Association between SARS-CoV-2 infection, exposure risk and mental health among a cohort of essential retail workers in the USA". *Occup Environ Med*. 2020 Oct 30:oemed-2020-106774.
132. Laroucau, K., et al. (2015). "Outbreak of psittacosis in a group of women exposed to *Chlamydia psittaci*-infected chickens." *Euro Surveill* 20(24): e21155.
133. Larson, K. R., et al. (2015). "Serological evidence of equine influenza infections among persons with horse exposure, Iowa." *J Clin Virol* 67: 78-83.
134. Lee, J. T., et al. (2013). "Seroprevalence of Hepatitis E Virus Infection among Swine Farmers and the General Population in Rural Taiwan." *PLoS ONE* 8(6): e67180.
135. Lee, V. J., et al. (2009). "An outbreak of salmonella gastrointestinal illness in a military camp." *Ann Acad Med Singapore* 38(3): 207-211.
136. Li, L., et al. (2017). "Nasal carriage of methicillin-resistant coagulase-negative staphylococci in healthy humans is associated with occupational pig contact in a dose-response manner." *Vet Microbiol* 208: 231-238.
137. Li, S., et al. (2016). "Avian influenza virus H9N2 seroprevalence and risk factors for infection in occupational poultry-exposed workers in Tai'an of China." *J MED VIROL* 88(8): 1453-1456.
138. Li, Y., et al. (2013). "An outbreak of norovirus gastroenteritis associated with a secondary water supply system in a factory in south China." *BMC Public Health* 13: 283.
139. Li, Z., et al. (2014). "Seroprevalence of antibodies against SFTS virus infection in farmers and animals, Jiangsu, China." *J Clin Virol* 60(3): 185-189.
140. Liang, H., et al. (2014). "The prevalence of hepatitis e virus infections among swine, swine farmers and the general population in Guangdong Province, China." *PLoS ONE* 9(2): e88106.
141. Linkevicius, M., et al. (2019). "Outbreak of invasive pneumococcal disease among shipyard workers, Turku, Finland, May to November 2019." *Eurosurveillance* 24(49): 1900681.
142. Liu, P. Y., et al. (2009). "Outbreak of influenza A and B among military recruits: Evidence from viral culture and polymerase chain reaction." *J Microbiol Immunol Infect* 42(2): 114-121.
143. Liu, W., et al. (2019). "Localized Outbreaks of Epidemic Polyarthrits among Military Personnel Caused by Different Sublineages of Ross River Virus, Northeastern Australia, 2016-2017." *Emerging Infect Dis* 25(10): 1793-1801.
144. Lopes-João, A., et al. (2015). "Multiple enteropathogenic viruses in a gastroenteritis outbreak in a military exercise of the Portuguese Army." *J Clin Virol* 68: 73-75.
145. López-Robles, G., et al. (2012). "Seroprevalence and Risk Factors for Swine Influenza Zoonotic Transmission in Swine Workers from Northwestern Mexico." *Transboundary Emer Dis* 59(2): 183-188.
146. Lord, H., et al. (2016). "A Q fever cluster among workers at an abattoir in south-western Sydney, Australia, 2015." *Western Pac Surveill Response J* 7(4): 21-27.
147. Ma, M., et al. (2015). "Serological evidence and risk factors for swine influenza infections among Chinese swine workers in guangdong province." *PLoS ONE* 10(5): e0128479..
148. Macdonald, E., et al. (2016). "National outbreak of *Yersinia enterocolitica* infections in military and civilian populations associated with consumption of mixed salad, Norway, 2014." *Euro Surveill* 21(34): e30321.

149. Marinho, T. A., et al. (2014). "Epidemiology of hepatitis B virus infection among recyclable waste collectors in central Brazil." *Rev Soc Bras Med Trop* 47(1): 18-23.
150. Marinho, T. A., et al. (2013). "Prevalence of hepatitis C virus infection among recyclable waste collectors in Central-West Brazil." *Mem Inst Oswaldo Cruz* 108(4): 519-522.
151. Marra, E., et al. (2018). "Vaginal and anal human papillomavirus infection and seropositivity among female sex workers in Amsterdam, the Netherlands: Prevalence, concordance and risk factors." *J INFECT* 76(4): 393-405.
152. Martins, R. M. B., et al. (2014). "Seroprevalence of hepatitis E antibodies in a population of recyclable waste pickers in Brazil." *J Clin Virol* 59(3): 188-191.
153. Matos, M. A., et al. (2017). "Viral hepatitis in female sex workers using the Respondent-Driven Sampling." *Rev Saude Publica* 51: 65.
154. Mayet, A., et al. (2011). "Food-borne outbreak of norovirus infection in a French military parachuting unit, april 2011." *Euro Surveill* 16(30): e19930.
155. Mayet, A., et al. (2011). "Novel influenza A(H1N1) outbreak among French armed forces in 2009: Results of Military Influenza Surveillance System." *PUBLIC HEALTH* 125(8): 494-500.
156. Mayet, A., et al. (2013). "The measles outbreak in the French military forces - 2010-2011: Results of epidemiological surveillance." *J INFECT* 66(3): 271-277.
157. Mbareche, H., et al. (2019). "Bioaerosols Play a Major Role in the Nasopharyngeal Microbiota Content in Agricultural Environment." *Int J Environ Res Public Health* 16: e1375.
158. McCurdy, S. A., et al. (2020). "Risk for coccidioidomycosis among hispanic farm workers, California, USA, 2018." *Emerg Infect Dis* 26(7): 1430-1437.
159. McKinnon, L. R., et al. (2014). "High HIV risk in a cohort of male sex workers from Nairobi, Kenya." *Sex Transm Infect* 90(3): 237-242.
160. McKinnon, L. R., et al. (2015). "Risk Factors for HIV Acquisition in a Prospective Nairobi-Based Female Sex Worker Cohort." *AIDS Behav* 19(12): 2204-2213.
161. Méndez, C., et al. (2019). "Prevalence of *Trypanosoma cruzi* infection in active military population of the Colombian National Army gathered in five departments." *PLoS ONE* 14(10): e0223611.
162. Mirzazadeh, A., et al. (2020). "Declining trends in HIV and other sexually transmitted infections among female sex workers in Iran could be attributable to reduced drug injection: A cross-sectional study." *Sex Transm Infect* 96(1): 68-75.
163. Moayedi-Nia, S., et al. (2016). "HIV, HCV, HBV, HSV, and syphilis prevalence among female sex workers in Tehran, Iran, by using respondent-driven sampling." *AIDS CARE PSYCHOL SOCIO-MED ASP AIDS HIV* 28(4): 487-490.
164. Mohd Ridzuan, J., et al. (2016). "Work environment-related risk factors for leptospirosis among plantation workers in tropical countries: Evidence from Malaysia." *Int J Occup Environ Med* 7(3): 156-163.
165. Mol, M. P. G., et al. (2016). "Seroprevalence of hepatitis B and C among domestic and healthcare waste handlers in Belo Horizonte, Brazil." *WASTE MANAGE RES* 34(9): 875-883.
166. Montuori, P., et al. (2009). "Wastewater workers and hepatitis A virus infection." *Occup Med (Oxf)* 59(7): 506-508.

167. Mor, Z. and M. Dan (2012). "Knowledge, attitudes, sexual practices and STI/HIV prevalence in male sex workers and other men who have sex in Tel Aviv, Israel: A cross-sectional study." *Sex Transm Infect* 88(8): 574-580.
168. Mossong, J., et al. (2009). "Mumps outbreak among the military in Luxembourg in 2008: epidemiology and evaluation of control measures." *Euro Surveill* 14(7): e19121.
169. Mostafavi, E., et al. (2019). "Seroprevalence of Q fever among high-risk occupations in the Ilam province, the west of Iran." *PLoS ONE* 14(2): e0211781.
170. Mughini-Gras, L., et al. (2017). "Hepatitis E virus infection in North Italy: High seroprevalence in swine herds and increased risk for swine workers." *EPIDEMIOL INFECT* 145(16): 3375-3384.
171. Mulders, M. N., et al. (2010). "Prevalence of livestock-associated MRSA in broiler flocks and risk factors for slaughterhouse personnel in the Netherlands." *EPIDEMIOL INFECT* 138(5): 743-755.
172. Munseri, P. J., et al. (2013). "Declining HIV-1 prevalence and incidence among Police Officers - a potential cohort for HIV vaccine trials, in Dar es Salaam, Tanzania." *BMC Public Health* 13: 722.
173. Muraguri, N., et al. (2015). "HIV and STI prevalence and risk factors among male sex workers and other men who have sex with men in Nairobi, Kenya." *J ACQUIRED IMMUNE DEFIC SYNDR* 68(1): 91-96.
174. Musyoki, H., et al. (2015). "Prevalence of HIV, sexually transmitted infections, and risk behaviours among female sex workers in Nairobi, Kenya: results of a respondent driven sampling study." *AIDS Behav* 19: S46-S58.
175. Mutagoma, M., et al. (2017). "Syphilis and HIV prevalence and associated factors to their co-infection, hepatitis B and hepatitis C viruses prevalence among female sex workers in Rwanda." *BMC Infect Dis* 17(1): 525.
176. Narayanan, P., et al. (2013). "An exploration of elevated HIV and STI risk among male sex workers from India." *BMC Public Health* 13: 1059.
177. National Institute for Infectious Diseases, Shinjuku-ku, Tokyo, Japan (2020). "Epidemiology of COVID-19 Outbreak on Cruise Ship Quarantined at Yokohama, Japan, February 2020". *Emerg Infect Dis* 26(11):2591-2597.
178. Navdarashvili, A., et al. (2016). "Human anthrax outbreak associated with livestock exposure: Georgia, 2012." *EPIDEMIOL INFECT* 144(1): 76-87.
179. Neo, F. J. X., et al. (2017). "Outbreak of caliciviruses in the Singapore military, 2015." *BMC Infect Dis* 17(1): 719.
180. Ngoupa, J. B., et al. (2019). "Seroprevalence and associated risk factors for Hepatitis B virus infection among barbers and their clients in two cities in Cameroon." *South Afr J Infect Dis*.
181. Nguyen, V. T., et al. (2019). "Limited contribution of non-intensive chicken farming to ESBL-producing *Escherichia coli* colonization in humans in Vietnam: an epidemiological and genomic analysis." *J Antimicrob Chemother* 74(3): 561-570.
182. Nicas, M. (2018). "A point-source outbreak of *Coccidioidomycosis* among a highway construction crew." *J Occup Environ Hyg* 15(1): 57-62.
183. Nielsen, L. E., et al. (2019). "Mumps outbreak and MMR IgG surveillance as a predictor for immunity in military trainees." *VACCINE* 37(42): 6139-6143.
184. Nielsen, S. Y., et al. (2013). "Prevalence of *Coxiella burnetii* in women exposed to livestock animals, Denmark, 1996 to 2002." *Euro Surveill* 18(28): e20528.



185. Nivesvivat, T., et al. (2016). "Methicillin-susceptible *Staphylococcus aureus* skin infections among military conscripts undergoing basic training in Bangkok, Thailand, in 2014." *BMC Res Notes* 9: 179.
186. Okoye, J., et al. (2013). "Serologic evidence of avian influenza virus infections among Nigerian agricultural workers." *J MED VIROL* 85(4): 670-676.
187. Oliveira-Filho, A. B., et al. (2019). "Hepatitis C virus among female sex workers: A cross-sectional study conducted along rivers and highways in the Amazon region." *Pathogens* 8(4): 236.
188. Oré, M., et al. (2015). "Outbreak of cutaneous leishmaniasis in peruvian military personnel undertaking training activities in the amazon basin, 2010." *AM J TROP MED HYG* 93(2): 340-346.
189. Pang, J., et al. (2015). "Risk factors for febrile respiratory illness and mono-viral infections in a semi-closed military environment: a case-control study." *BMC Infect Dis* 15: 288.
190. Park, J. N., et al. (2019). "Incidence and Predictors of Chlamydia, Gonorrhea and Trichomonas among a Prospective Cohort of Cisgender Female Sex Workers in Baltimore, Maryland." *SEX TRANSM DIS* 46 (12): 788-794.
191. Park, W. J., et al. (2015). "Respiratory syncytial virus outbreak in the basic military training camp of the republic of Korea Air Force." *J Prev Med Public Health* 48(1): 10-17.
192. Parveen, S. M. A., et al. (2016). "Leptospirosis seroprevalence among blue metal mine workers of Tamil Nadu, India." *AM J TROP MED HYG* 95(1): 38-42.
193. Patterson, T. L., et al. (2019). "Prevalence of HIV/STIs and correlates with municipal characteristics among female sex workers in 13 Mexican cities." *Salud Publica Mex* 61(2): 116-124.
194. Pawar, S. D., et al. (2012). "Avian influenza H9N2 seroprevalence among poultry workers in Pune, India, 2010." *PLoS ONE* 7(5): e36374.
195. Pirnay, J. P., et al. (2020). "Study of a SARS-CoV-2 Outbreak in a Belgian Military Education and Training Center in Maradi, Niger." *Viruses* 12(9).
196. Quan, C., et al. (2019). "Avian influenza A viruses among occupationally exposed populations, China, 2014-2016." *Emerg Infect Dis* 25(12): 2215-2225.
197. Rachiotis, G., et al. (2012). "Hepatitis A virus infection and the waste handling industry: A seroprevalence study." *Int J Environ Res Public Health* 9(12): 4498-4503.
198. Ramos, M., et al. (2013). "Outbreak of Group A beta hemolytic *Streptococcus* pharyngitis in a Peruvian military facility, April 2012." *MSMR* 20(6): 14-17.
199. Raza, N., et al. (2009). "Risk factors for scabies among male soldiers in Pakistan: Case-control study." *East Mediterr Health J* 15(5): 1105-1110.
200. Reeves, W. K., et al. (2015). "Case series: Chikungunya and dengue at a forward operating location." *MSMR* 22(5): 9-10.
201. Remoli, M. E., et al. (2018). "Seroprevalence survey of arboviruses in workers from Tuscany, Italy." *MED LAV* 109(2): 125-131.
202. Ricci, M. L., et al. (2010). "A preliminary assessment of the occupational risk of acquiring Legionnaires' disease for people working in telephone manholes, a new workplace environment for *Legionella* growth." *AM J INFECT CONTROL* 38(7): 540-545.

203. Richter, A., et al. (2012). "Prevalence of types of methicillin-resistant *Staphylococcus aureus* in turkey flocks and personnel attending the animals." *EPIDEMIOLOGICAL INFECTION* 140(12): 2223-2232.
204. Ringshausen, F. C., et al. (2013). "Frequent detection of latent tuberculosis infection among aged underground hard coal miners in the absence of recent tuberculosis exposure." *PLoS ONE* 8(12): e82005.
205. Rodkvamtook, W., et al. (2011). "Isolation and characterization of *Orientia tsutsugamushi* from rodents captured following a scrub typhus outbreak at a military training base, Bothong district, Chonburi province, central Thailand." *AM J TROPICAL MEDICAL AND HYGIENE* 84(4): 599-607.
206. Rosenberg Goldstein, R. E., et al. (2014). "Occupational exposure to *Staphylococcus aureus* and *Enterococcus* spp. among spray irrigation workers using reclaimed water." *International Journal of Environmental Research and Public Health* 11(4): 4340-4355.
207. Rossow, H., et al (2014). "Risk factors for pneumonic and ulceroglandular tularemia in Finland: A population-based case-control study". *Epidemiol Infect* 142:2207-2216.
208. Royal, J., et al. (2013). "Seroepidemiologic survey for *Coxiella burnetii* among US military personnel deployed to southwest and central Asia in 2005." *AM J TROPICAL MEDICAL AND HYGIENE* 89(5): 991-995.
209. Sahibzada, S., et al. (2018). "Emergence of highly prevalent CA-MRSA ST93 as an occupational risk in people working on a pig farm in Australia." *PLoS ONE* 13(5): e0195510.
210. Sahneh, E., et al. (2019). "Investigation of Risk Factors Associated with Leptospirosis in the North of Iran (2011-2017)." *J. res. health sci.* 19(2): e00449.
211. Sakamoto, R., et al. (2009). "Is driving a car a risk for Legionnaires' disease?" *EPIDEMIOLOGICAL INFECTION* 137(11): 1615-1622.
212. Sanchez, M. A., et al. (2017). "Norovirus GII.17 Outbreak Linked to an Infected Post-Symptomatic Food Worker in a French Military Unit Located in France." *Food Environ Virol* 9(2): 234-237.
213. Sánchez-Anguiano, L. F., et al. (2019). "Prevalence of *Chlamydia trachomatis* infection diagnosed by polymerase chain reaction in female sex workers in a northern Mexican City." *Eur J Microbiol Immunol* 9(1): 5-8.
214. Santos, L., et al. (2013). "Acute histoplasmosis in three Mexican sewer workers." *OCCUP MED* 63(1): 77-79.
215. Sargianou, M., et al. (2013). "Crimean-Congo hemorrhagic fever: Seroprevalence and risk factors among humans in Achaia, western Greece." *Int J Infect Dis* 17(12): e1160-e1165.
216. Schimmer, B., et al. (2012). "Seroprevalence and risk factors for *Coxiella burnetii* (Q fever) seropositivity in dairy goat farmers' households in the Netherlands, 2009-2010." *PLoS ONE* 7(7): e42364.
217. Schønning, M. H., et al. (2019). "A Case-Control Study of Environmental and Occupational Risks of Leptospirosis in Sri Lanka." *EcoHealth* 16, 534–543.
218. Şevketbeyoğlu, H., et al. (2012). "Outbreak of *Chlamydia pneumoniae* infection in a military unit: The distribution of lobar and segmental infiltration." *Nobel Med* 8(2): 26-31.
219. Sharma, S., et al. (2019). "Epidemiological investigation of viral hepatitis E outbreak in two collocated military training centers, North India, April–June 2016." *Med J Armed Forces India* 2017: 1-7.



220. Shaw, K. A., et al. (2019). "Psittacosis Outbreak among Workers at Chicken Slaughter Plants, Virginia and Georgia, USA, 2018." *Emerging Infect Dis* 25(11): 2143-2145.
221. Shikova, E., et al. (2011). "Prevalence of human papillomavirus infection among female sex workers in Bulgaria." *INT J STD AIDS* 22(5): 278-280.
222. Shimizu, K., et al. (2016). "Seroevidence for a high prevalence of subclinical infection with avian influenza a(h5n1) virus among workers in a live-poultry market in Indonesia." *J INFECT DIS* 214(12): 1929-1936.
223. Steinberg, J., et al. (2020). "COVID-19 Outbreak Among Employees at a Meat Processing Facility - South Dakota, March-April 2020." *MMWR Morb Mortal Wkly Rep* 69(31): 1015-1019.
224. Sun, H., et al. (2012). "Cooling towers contribute to the high seroprevalence of Legionella pneumophila antibody among hotel workers." *J Public Health* 20(4): 425-430.
225. Sun, W. W., et al. (2016). "Coxiella burnetii Seroprevalence and Risk Factors in Cattle Farmers and Farm Residents in Three Northeastern Provinces and Inner Mongolia Autonomous Region, China." *BioMed Res Int* 2016: e7059196.
226. Sulaiman, A. A., et al. (2020). "An outbreak of measles in gold miners in River Nile State, Sudan, 2011." *East Mediterr Health J* 26(2): 152-160.
227. Swai, E. S. and L. Schoonman (2009). "Human brucellosis: Seroprevalence and risk factors related to high risk occupational groups in Tanga municipality, Tanzania." *Zoonoses Public Health* 56(4): 183-187.
228. Sweet, K., et al. (2020). "Prevalence, incidence, and distribution of human papillomavirus types in female sex workers in Kenya." *INT J STD AIDS* 31(2): 109-118.
229. Tabibi, R., et al. (2013). "Occupational exposure to zoonotic agents among agricultural workers in Lombardy Region, Northern Italy." *Ann Agric Environ Med* 20(4): 676-681.
230. Tan, X. Q., et al. (2014). "Respiratory viral pathogens among Singapore military servicemen 2009 - 2012: Epidemiology and clinical characteristics." *BMC Infect Dis* 14(1): 204.
231. Tang, W., et al. (2015). "Burden of HIV and syphilis: A comparative evaluation between male sex workers and non-sex-worker men who have sex with men in urban China." *PLoS ONE* 10(5): e0126604.
232. Teague, N. S., et al. (2013). "Outbreak of staphylococcal food poisoning from a military unit lunch party - United States, July 2012." *Morb Mortal Wkly Rep* 62(50): 1026-1028.
233. Teixeira, J., et al. (2017). "Prevalence of hepatitis E virus antibodies in workers occupationally exposed to swine in Portugal." *Med Microbiol Immunol* 206(1): 77-81.
234. Theamboonlers, A., et al. (2009). "Molecular characterization of Hepatitis A Virus causing an outbreak among Thai navy recruits." *Tropical Biomed* 26(3): 352-359.
235. Toepp, A. J., et al. (2018). "Frequent Exposure to Many Hunting Dogs Significantly Increases Tick Exposure." *Vector Borne Zoonotic Dis* 18(10): 519-523.
236. Torén, K., et al. (2020). "Occupational exposure to dust and to fumes, work as a welder and invasive pneumococcal disease risk." *OCCUP ENVIRON MED* 77(2): 57-63.
237. Torres-Gonzalez, P., et al. (2013). "Prevalence of latent and active tuberculosis among dairy farm workers exposed to cattle infected by Mycobacterium bovis." *PLoS Negl Trop Dis* 7(4): e2177.

238. Toseva, E. I., et al. (2018). "Seroprevalence of anti-HAV total antibodies among workers in wastewater treatment plants." *Int J Occup Med Environ Health* 31(3): 307-315.
239. Traoré, K. A., et al. (2015). "Hepatitis E virus exposure is increased in pork butchers from Burkina Faso." *AM J TROP MED HYG* 93(6): 1356-1359.
240. Tschopp, A., et al. (2009). "Hepatitis E, *Helicobacter pylori* and peptic ulcers in workers exposed to sewage: A prospective cohort study." *OCCUP ENVIRON MED* 66(1): 45-50.
241. Vainio, A., et al. (2009). "An outbreak of pneumonia associated with *S. pneumoniae* at a military training facility in Finland in 2006." *APMIS* 117(7): 488-491.
242. van Cleef, B. A. G. L., et al. (2010). "High prevalence of nasal MRSA carriage in slaughterhouse workers in contact with live pigs in the Netherlands." *EPIDEMIOLOG INFECT* 138(5): 756-763.
243. van Cleef, B. A. G. L., et al. (2011). "Persistence of livestock-associated methicillin-resistant *Staphylococcus aureus* in field workers after short-term occupational exposure to pigs and veal calves." *J CLIN MICROBIOL* 49(3): 1030-1033.
244. van Veen, M. G., et al. (2010). "HIV and sexual risk behavior among commercial sex workers in the Netherlands." *Arch Sex Behav* 39(3): 714-723.
245. Verhaegh-Haasnoot, A., et al. (2015). "High burden of STI and HIV in male sex workers working as internet escorts for men in an observational study: a hidden key population compared with female sex workers and other men who have sex with men." *BMC Infect Dis* 15: 291.
246. Vilay, P., et al. (2019). "Malaria prevalence, knowledge, perception, preventive and treatment behavior among military in Champasak and Attapeu provinces, Lao PDR: A mixed methods study." *Trop Med Health* 47(1).
247. Vorsters, A., et al. (2016). "Prevalence of high-risk human papillomavirus and abnormal pap smears in female sex workers compared to the general population in Antwerp, Belgium." *BMC Public Health* 16: 477.
248. Vu, L. and K. Misra (2018). "High Burden of HIV, Syphilis and HSV-2 and Factors Associated with HIV Infection Among Female Sex Workers in Tanzania: Implications for Early Treatment of HIV and Pre-exposure Prophylaxis (PrEP)." *AIDS Behav* 22(4): 1113-1121.
249. Wadl, M., et al. (2010). "Food-borne norovirus-outbreak at a military base, Germany, 2009." *BMC Infect Dis* 10: 30.
250. Wang, X., et al. (2014). "Seroprevalence to avian influenza A(H7N9) virus among poultry workers and the general population in Southern China: A longitudinal study." *CLIN INFECT DIS* 59(6): e76-83.
251. Wang, X., et al. (2013). "Hospital-based prevalence of high-risk cervical HPV types infecting the general population and female sex workers in Huzhou, China." *Int J Gynecol Obstet* 120(1): 37-41.
252. Watier-Grillot, S., et al. (2017). "Challenging Investigation of a Norovirus Foodborne Disease Outbreak During a Military Deployment in Central African Republic." *Food Environ Virol* 9(4): 498-501.
253. Wickersham, J. A., et al. (2017). "Prevalence of Human Immunodeficiency Virus and Sexually Transmitted Infections among Cisgender and Transgender Women Sex Workers in Greater Kuala Lumpur, Malaysia: Results from a Respondent-Driven Sampling Study." *SEX TRANSM DIS* 44(11): 663-670.

254. Wilczynski, J. A., et al. (2012). "Outbreak of cryptosporidiosis associated with a firefighting response - Indiana and Michigan, June 2011." *Morb Mortal Wkly Rep* 61(9): 153-156.
255. Wilken, J. A., et al. (2014). "Coccidioidomycosis among cast and crew members at an outdoor television filming event--California, 2012." *MMWR Morb Mortal Wkly Rep* 63(15): 321-324.
256. Williams, C. J., et al. (2013). "Risk exposures for human ornithosis in a poultry processing plant modified by use of personal protective equipment: an analytical outbreak study." *EPIDEMIOLOGICAL INFECTION* 141(9): 1965-1974.
257. Wilson, L. E., et al. (2010). "Investigation of a Q fever outbreak in a Scottish co-located slaughterhouse and cutting plant." *Zoonoses Public Health* 57(7-8): 493-498.
258. Wongsanuphat, S., et al. (2020). "Investigation of measles outbreak among thai and migrant workers in two factories in Nakhon Pathom, Thailand, 2019." *Int J Environ Res Public Health* 17(13): 1-11.
259. Wu, J., et al. (2015). "Anti-Human H1N1pdm09 and swine H1N1 Virus Antibodies among Swine Workers in Guangdong Province, China." *Sci Rep* 5: 12507.
260. Wu, J. Y., et al. (2019). "Transmission risk of avian influenza virus along poultry supply chains in Guangdong, China." *J INFECTION* 79(1): 43-48.
261. Yang, S., et al. (2014). "Avian-origin influenza A(H7N9) infection in influenza A(H7N9)-affected areas of China: a serological study." *J INFECTION DIS* 209(2): 265-269.
262. Ye, X., et al. (2016). "Livestock-associated methicillin and multidrug resistant *S. aureus* in humans is associated with occupational pig contact, not pet contact." *Sci. rep.* 6: 19184.
263. Ye, X., et al. (2015). "Frequency-risk and duration-risk relations between occupational livestock contact and methicillin-resistant *Staphylococcus aureus* carriage among workers in Guangdong, China." *AM J INFECTION CONTROL* 43(7): 676-681.
264. Yoon, C. G., et al. (2019). "The infectivity of pulmonary tuberculosis in Korean army units: Evidence from outbreak investigations." *Tuberc Respir Dis* 82(4): 298-305.
265. Younis, F., et al. (2020). "Respiratory health disorders associated with occupational exposure to bioaerosols among workers in poultry breeding farms." *Environ Sci Pollut Res Int.* 10.1007/s11356-020-08485-x.
266. Yu, J., et al. (2020). "Vietnamese female sex workers in rural cross-border areas of Guangxi, China: migration and HIV/STI risk behaviors." *Aids Care* Feb 3;1-9.
267. Yu, P., et al. (2013). "Outbreak of acute respiratory disease caused by human adenovirus type 7 in a military training camp in Shaanxi, China." *MICROBIOLOGICAL IMMUNOLOGY* 57(8): 553-560.
268. Zákutná, L., et al. (2015). "Sero-epidemiological study of Lyme disease among high-risk population groups in eastern Slovakia." *Ann Agric Environ Med* 22(4): 632-636.
269. Zalla, L. C., et al. (2019). "The burden of HIV among female sex workers, men who have sex with men and transgender women in Haiti: results from the 2016 Priorities for Local AIDS Control Efforts (PLACE) study." *J Int AIDS Soc* 22(7): e25281.
270. Zermiani, M., et al. (2012). "Prevalence of sexually transmitted diseases and Hepatitis C in a survey of female sex workers in the North-east of Italy." *Open AIDS J* 6(1): 60-64.
